# Supplementary material for: Phenothiazine cyclic hexamers: synthesis, properties, and complexation behavior with C60
Source: Royal Society of Chemistry journal article supplement (doi:10.1039/d3cc06206f), 2024-01-01
Supplement: d3cc06206f1.pdf [file d3cc06206f1.pdf]

*Electronic supplementary information*

**Phenothiazine cyclic hexamers:  
synthesis, properties, and complexation behavior with C<sub>60</sub>**

Koji Yamamoto,\*<sup>1</sup> Kanta Tsutsui,<sup>2</sup> Miho Tanuma,<sup>2</sup> Kaname Ito,<sup>2</sup> Kan Wakamatsu,<sup>3</sup> Koji Yamamoto,<sup>4</sup>  
Yosuke Nakamura\*<sup>2</sup>

<sup>1</sup> *Department of Pharmaceutical Sciences, Shujitsu University, 1-6-1 Nishigawara, Okayama 703-8516, Japan*

<sup>2</sup> *Division of Molecular Science, Faculty of Science and Technology, Gunma University, 1-5-1 Tenjin-cho, Kiryu, Gunma 376-8515, Japan.*

<sup>3</sup> *Department of Chemistry, Faculty of Science, Okayama University of Science, 1-1 Ridaicho Kita-ku, Okayama 700-0005, Japan*

<sup>4</sup> *Department of Applied Chemistry, National Defense Academy, 1-10-20 Hashirimizu Yokosuka, Kanagawa 239-8686, Japan*

e-mail: [yamakou@shujitsu.ac.jp](mailto:yamakou@shujitsu.ac.jp), [nakamura@gunma-u.ac.jp](mailto:nakamura@gunma-u.ac.jp)

**Table of Contents**

|                                                   |           |
|---------------------------------------------------|-----------|
| 1. General Information                            | (S2)      |
| 2. Supporting Figures and Tables                  | (S3–S14)  |
| 3. Synthesis of Compounds                         | (S15–S18) |
| 4. X-ray Crystallographic Analysis                | (S19)     |
| 5. Theoretical Calculations                       | (S20–S40) |
| 6. Job's Plot Experiments by NMR                  | (S41)     |
| 7. Titration Experiments by UV–vis                | (S41)     |
| 8. <sup>1</sup> H and <sup>13</sup> C NMR Spectra | (S42–S49) |
| 9. ESI- and MALDI-TOF-MS Spectra                  | (S50–S52) |
| 10. References                                    | (S53)     |

## 1. General Information

Commercially available reagents and solvents were used as received. Compounds **5b**<sup>[1]</sup> and **6b**<sup>[1]</sup> were prepared according to the literature procedures. Oil bath was used as the heat source. Column chromatography and plug filtrations were carried out with SiO<sub>2</sub>. Thin-layer chromatography (TLC) was conducted on aluminum sheets coated with SiO<sub>2</sub> 60 F<sub>254</sub>. Melting points (M.p.) were measured with a hot-stage apparatus (Yanako MP-S3) and are uncorrected. Recycling gel-permeation chromatography (JAI LC-9210 NEXT) was performed with CHCl<sub>3</sub>. <sup>1</sup>H and <sup>13</sup>C NMR spectra were measured on a spectrometer (JEOL JNM-ECA600, JNM-ECZ500, or JNM-ECS400) at 600, 500, or 400 MHz for <sup>1</sup>H and 150 or 125 MHz for <sup>13</sup>C, respectively. Chemical shifts are given as  $\delta$  values. <sup>1</sup>H NMR shifts in deuterated solvents were relative to the residual solvent signals: CDCl<sub>3</sub> ( $\delta$  7.26), CD<sub>2</sub>Cl<sub>2</sub> ( $\delta$  5.32), toluene-*d*<sub>8</sub> ( $\delta$  2.08), and THF-*d*<sub>8</sub> ( $\delta$  3.58). <sup>13</sup>C NMR shifts in deuterated solvents were relative to the residual solvent signals: CDCl<sub>3</sub> ( $\delta$  77.16) and CD<sub>2</sub>Cl<sub>2</sub> ( $\delta$  53.82). The coupling constants (*J*) are given in Hz. The apparent resonance multiplicity is described as s (singlet), d (doublet), t (triplet), sept (septet), and m (multiplet). UV-vis spectra were measured on a SHIMADZU UV-2550. The absorption maxima ( $\lambda_{\text{max}}$ ) are reported in nm with the molar absorptivity in brackets. Fluorescence spectra in CH<sub>2</sub>Cl<sub>2</sub> were measured on a HITACHI F-4500 fluorescence spectrophotometer. Fluorescence lifetimes were measured by the time-correlated single-photon counting method using a nanosecond laser system based on an LED pulse (HORIBA). The absolute fluorescence quantum yields were measured by an integrating sphere system (Hamamatsu Photonics K.K.). The spectra were measured in a cuvette of 1 cm at 298 K. Cyclic voltammetry and differential pulse voltammetry were performed by using a cell equipped with a platinum as a working electrode, a platinum wire as a counter electrode, and Ag/Ag<sup>+</sup> as a referential electrode. All electrochemical measurements were performed in *o*-DCB solution (*ca.* 1.0 × 10<sup>-3</sup> mol L<sup>-1</sup>) containing 0.05 mol L<sup>-1</sup> *n*-Bu<sub>4</sub>NPF<sub>6</sub> at ambient temperature. MALDI-TOF-MS spectra were measured with a SHIMADZU AXIMA Performance mass spectrometer with dithranol as a matrix in a positive mode. ESI-TOF-MS spectra were measured on Bruker Compact<sup>TM</sup> ESI-QTOF in a positive mode.

## 2. Supporting Figures and Tables

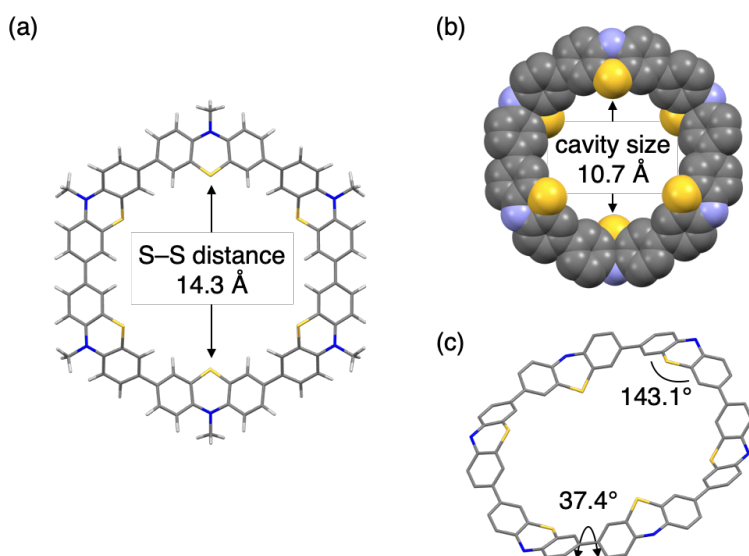

**Figure S1.** Calculated structures of **1a'** at B3LYP-D3/6-31G(d,p) level of theory.

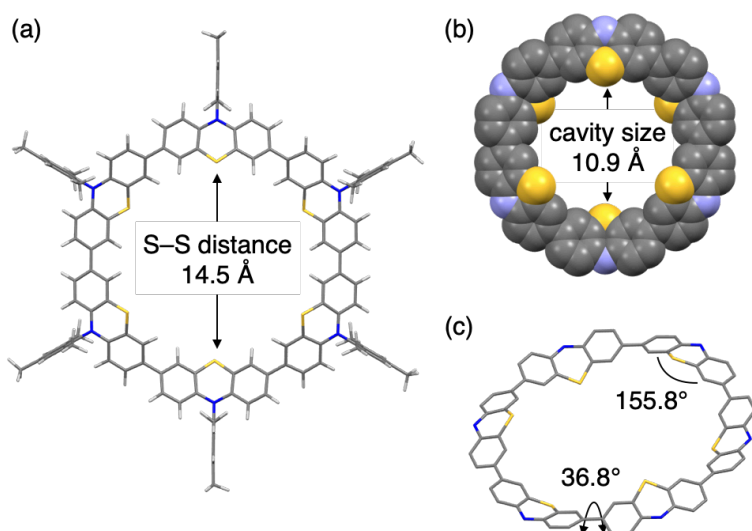

**Figure S2.** Calculated structures of **1b** at B3LYP-D3/6-31G(d,p) level of theory.

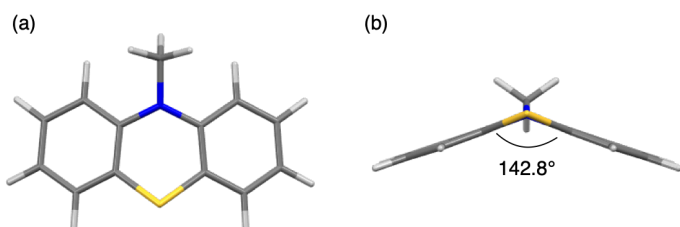

**Figure S3.** Calculated structures of *N*-methylphenothiazine at B3LYP-D3/6-31G(d,p) level of theory.

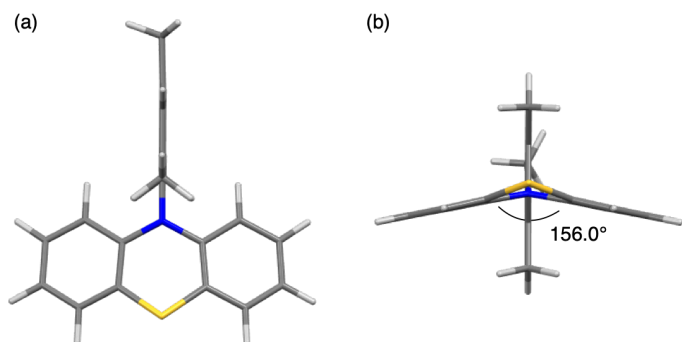

**Figure S4.** Calculated structures of *N*-mesitylphenothiazine at B3LYP-D3/6-31G(d,p) level of theory.

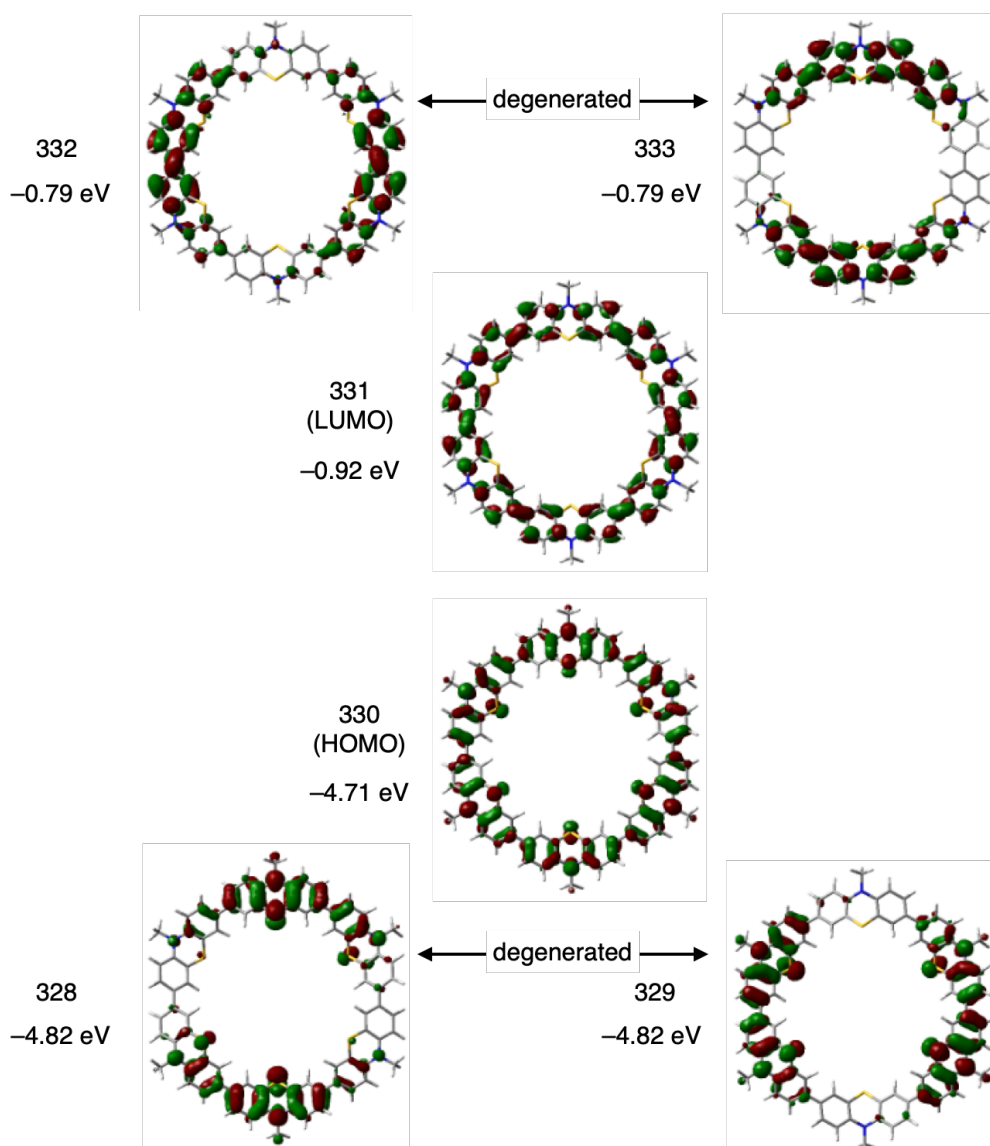

**Figure S5.** Frontier molecular orbitals and the energy levels of **1a'** calculated at B3LYP-D3/6-31G(d,p) level of theory (isosurface value = 0.02).



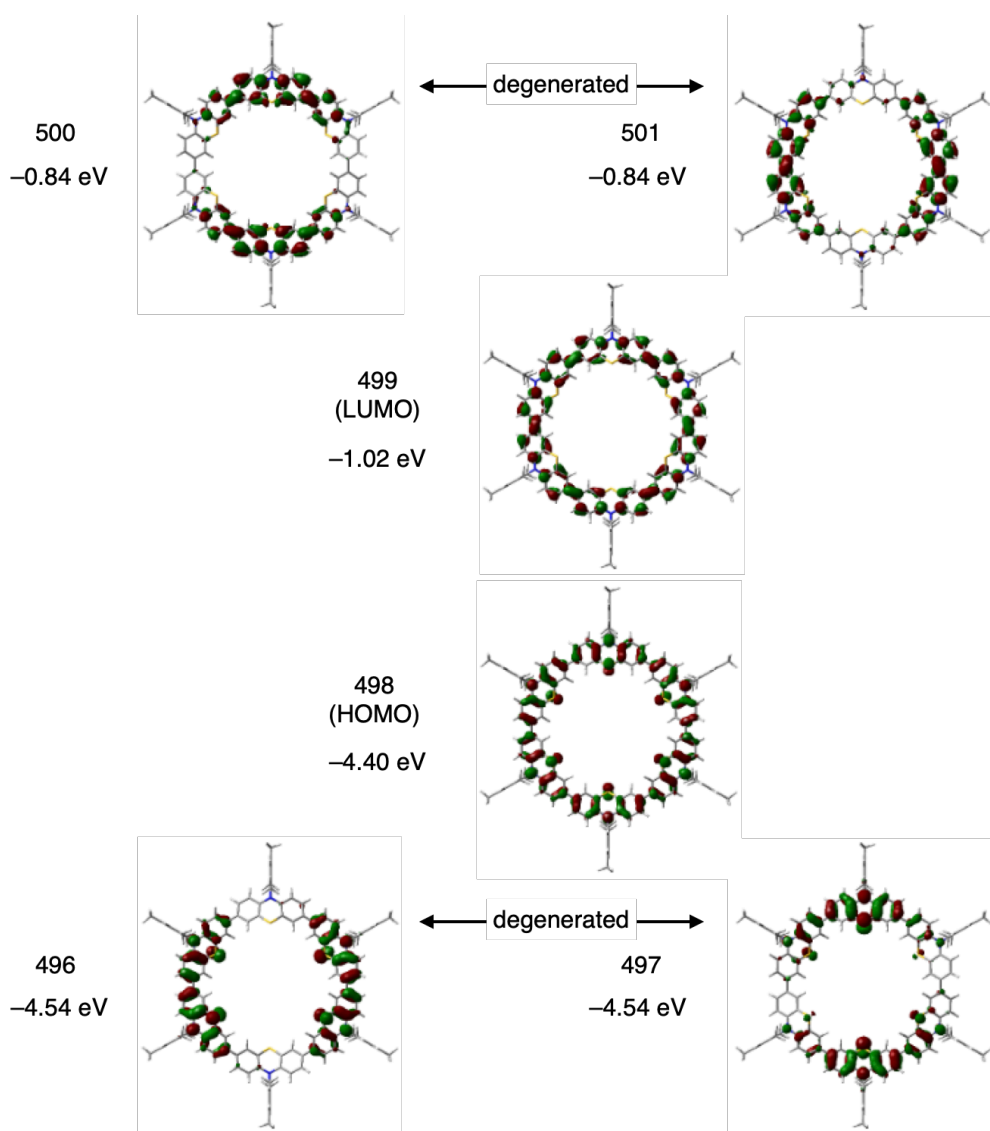

**Figure S6.** Frontier molecular orbitals and the energy levels of **1b** calculated at B3LYP-D3/6-31G(d,p) level of theory (isosurface value = 0.02).

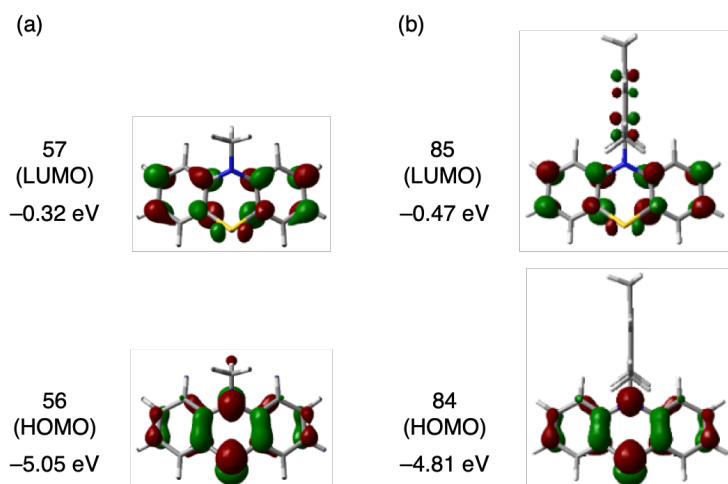

**Figure S7.** Frontier molecular orbitals and the energy levels of (a) *N*-methylphenothiazine and (b) *N*-mesitylphenothiazine calculated at B3LYP-D3/6-31G(d,p) level of theory (isosurface value = 0.05).

**Table S1.** Calculated Lowest Excitation Energies of **1a'** and **1b**<sup>a</sup>

|            | $\lambda_{\max}^{\text{calcd}}$ (nm) | $f^b$  | Configuration                                          |
|------------|--------------------------------------|--------|--------------------------------------------------------|
| <b>1a'</b> | 392.12                               | 0.0000 | H (330) -> L (331) (62%)                               |
|            | 377.23                               | 0.6771 | H-1 (329) -> L (331) (48%), H (330) -> L+1 (332) (36%) |
|            | 377.19                               | 0.6768 | H-2 (328) -> L (331) (48%), H (330) -> L+2 (333) (36%) |
| <b>1b</b>  | 444.19                               | 0.0000 | H (498) -> L (499) (70%)                               |
|            | 421.17                               | 0.8898 | H-1 (497)-> L (499) (51%), H (498)-> L+1 (500) (36%)   |
|            | 421.00                               | 0.8878 | H-2 (496)-> L (499) (51%), H (498)-> L+2 (501) (36%)   |

<sup>a</sup>TD-DFT (TD-B3LYP-D3/6-31+G(d,p)) calculations were carried out with use of optimized structures at B3LYP-D3/6-31G(d,p). <sup>b</sup> $f$  = oscillator strength; H = HOMO; L = LUMO. The numbers in the parentheses correspond to the numbers of orbitals in Figure S5 for **1a'** and Figure S6 for **1b**.

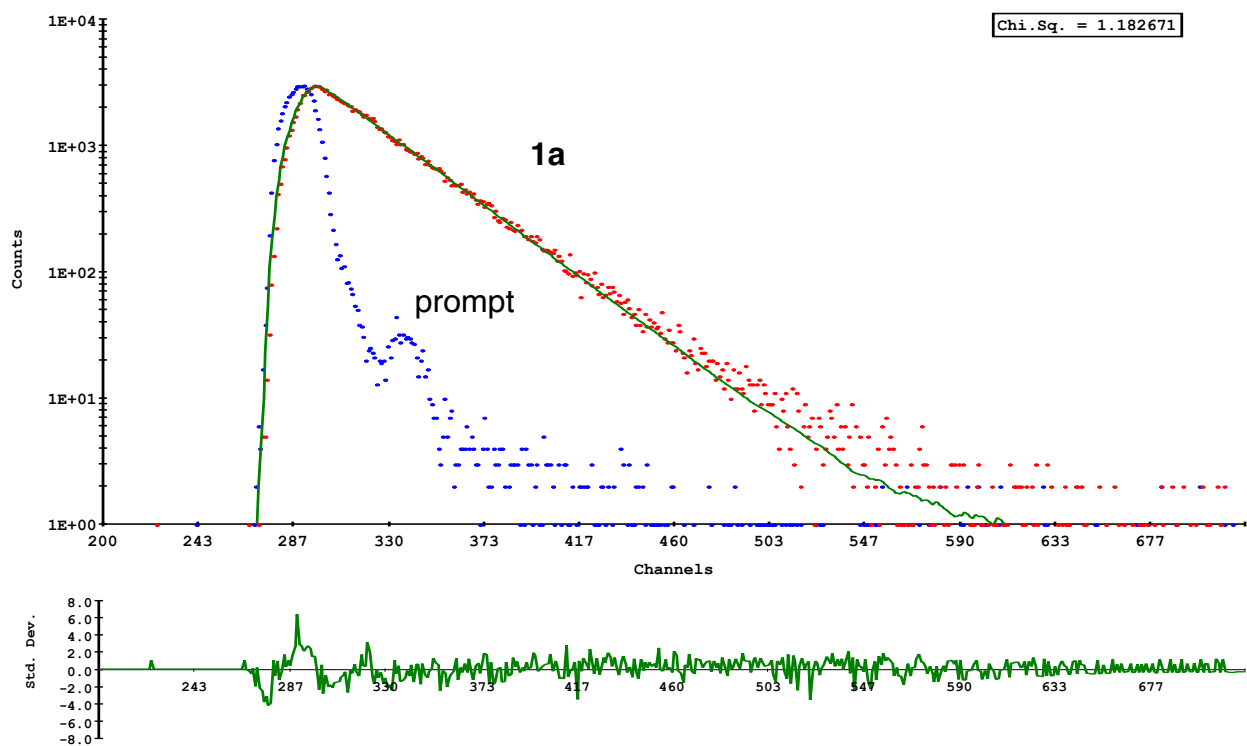

**Figure S8.** Fluorescence decay curve (top) and residual (bottom) of **1a** in  $\text{CH}_2\text{Cl}_2$  after bubbling with Ar.

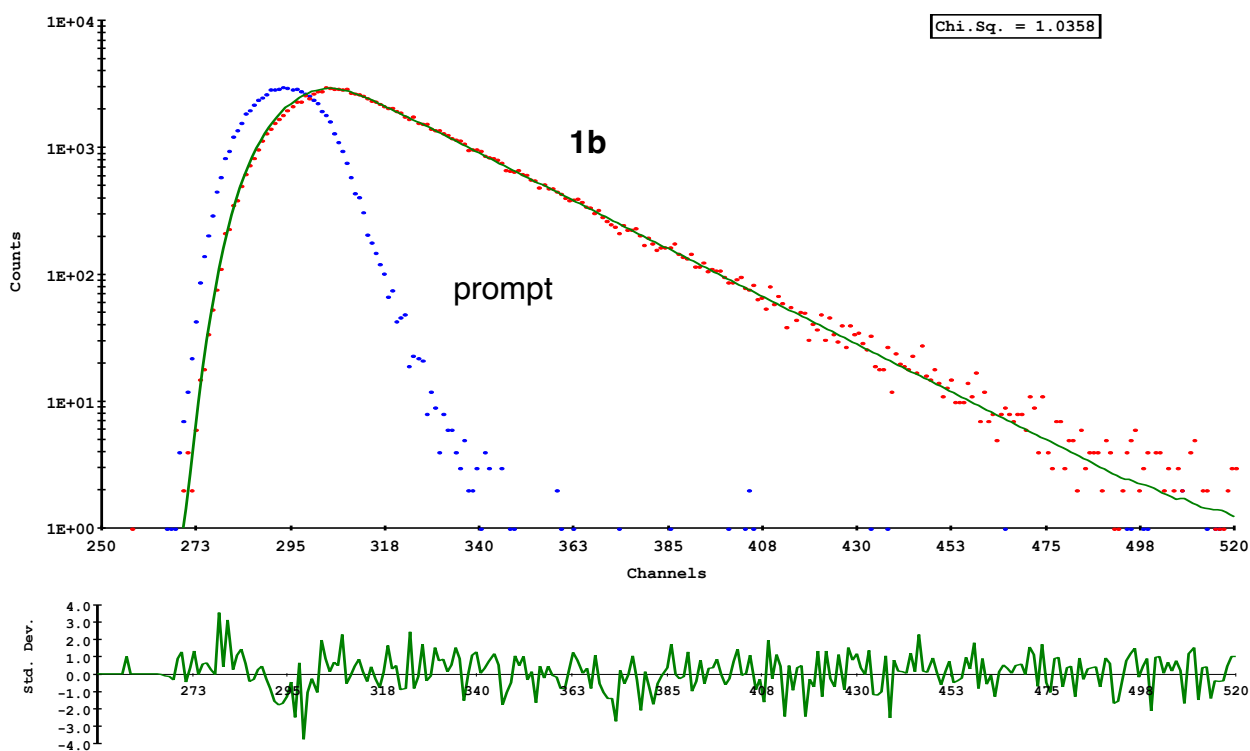

**Figure S9.** Fluorescence decay curve (top) and residual (bottom) of **1b** in  $\text{CH}_2\text{Cl}_2$  after bubbling with Ar.

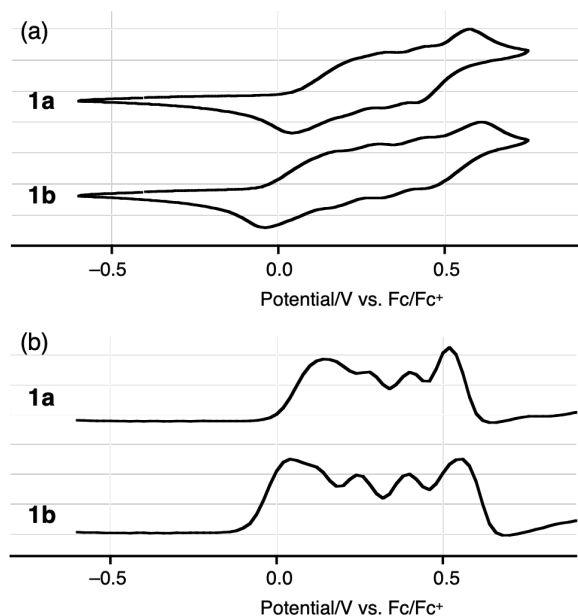

**Figure S10.** (a) Cyclic voltammograms of **1a** and **1b** measured at scan rate of  $100 \text{ mV s}^{-1}$  and (b) differential pulse voltammograms of **1a** and **1b** measured at pulse width of  $100 \text{ ms}$  in a period of  $200 \text{ ms}$  in *o*-DCB ( $0.05 \text{ mol L}^{-1} n\text{Bu}_4\text{NPF}_6$ ) at  $298 \text{ K}$ .

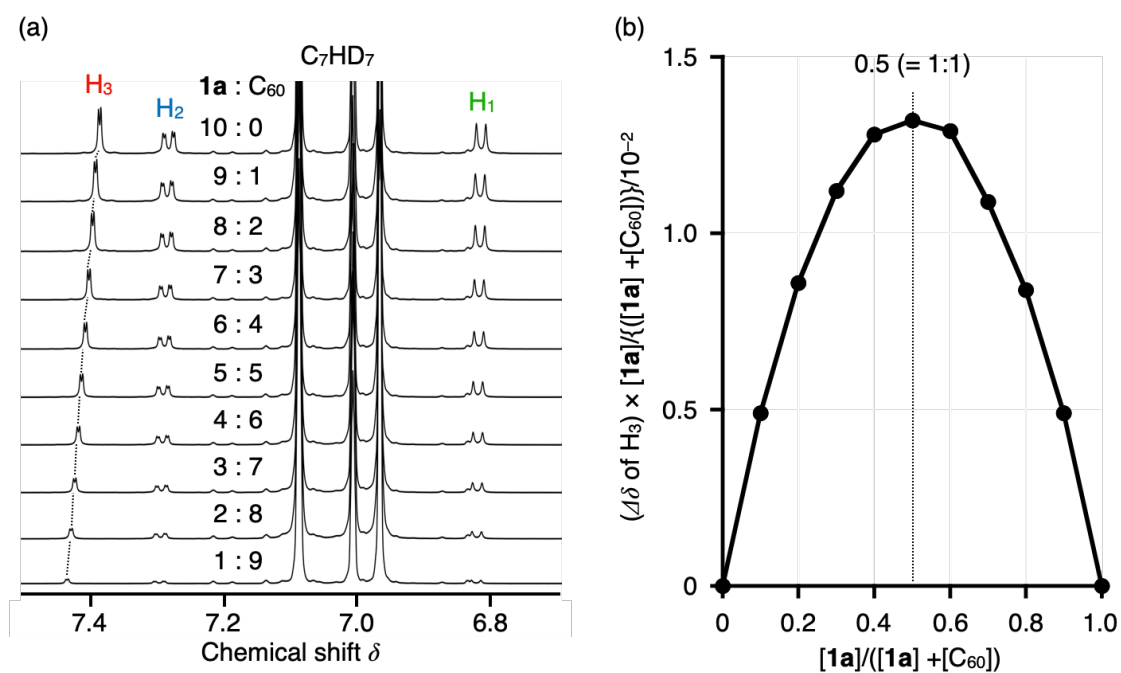

**Figure S11.** (a)  $^1\text{H}$  NMR spectra of the mixture of **1a** and  $\text{C}_{60}$  in various ratios and (b) Job's plot of complexation of **1a** and  $\text{C}_{60}$  at the total concentration of  $1.0 \text{ mM}$  in toluene- $d_8$  at  $298 \text{ K}$ .  $[\mathbf{1a}] = 0$  to  $1.0 \times 10^{-3} \text{ mol L}^{-1}$  and  $[\text{C}_{60}] = 0$  to  $1.0 \times 10^{-3} \text{ mol L}^{-1}$ .

**Table S2.** Observed  $^1\text{H}$  NMR Chemical Shifts of  $\text{H}_1$ ,  $\text{H}_2$ , and  $\text{H}_3$  Signals of **1a** at Various Molar Fractions of **1a** and  $\text{C}_{60}$  in Toluene- $d_8$  at 298 K

| [ <b>1a</b> ]<br>/ $10^{-3}$ mol L $^{-1}$ | [ $\text{C}_{60}$ ]<br>/ $10^{-3}$ mol L $^{-1}$ | [ <b>1a</b> ]/([ <b>1a</b> ]+[ $\text{C}_{60}$ ]) | $\delta$ of $\text{H}_1$ | $\delta$ of $\text{H}_2$ | $\delta$ of $\text{H}_3$ |
|--------------------------------------------|--------------------------------------------------|---------------------------------------------------|--------------------------|--------------------------|--------------------------|
| 1.0                                        | 0                                                | 1.0                                               | 6.816 ( $\delta_0$ )     | 7.286 ( $\delta_0$ )     | 7.390 ( $\delta_0$ )     |
| 0.90                                       | 0.10                                             | 0.90                                              | 6.817                    | 7.288                    | 7.395                    |
| 0.80                                       | 0.20                                             | 0.80                                              | 6.818                    | 7.289                    | 7.400                    |
| 0.70                                       | 0.30                                             | 0.70                                              | 6.819                    | 7.290                    | 7.405                    |
| 0.60                                       | 0.40                                             | 0.60                                              | 6.820                    | 7.292                    | 7.411                    |
| 0.50                                       | 0.50                                             | 0.50                                              | 6.820                    | 7.294                    | 7.416                    |
| 0.40                                       | 0.60                                             | 0.40                                              | 6.281                    | 7.295                    | 7.422                    |
| 0.30                                       | 0.70                                             | 0.30                                              | 6.822                    | 7.297                    | 7.427                    |
| 0.20                                       | 0.80                                             | 0.20                                              | 6.823                    | 7.298                    | 7.433                    |
| 0.10                                       | 0.90                                             | 0.10                                              | 6.824                    | 7.300                    | 7.439                    |

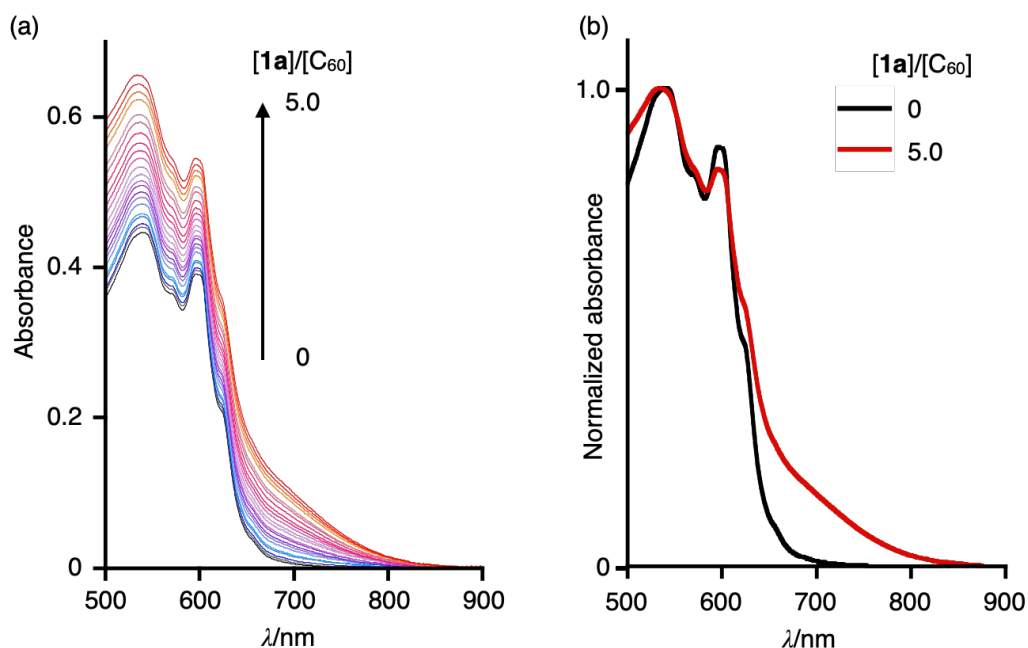

**Figure S12.** (a) UV-vis spectral change of  $\text{C}_{60}$  upon addition of **1a** in toluene at 298 K.  $[\text{C}_{60}] = 0.50 \times 10^{-3}$  mol L $^{-1}$  and  $[\mathbf{1a}] = 0$  to  $2.5 \times 10^{-3}$  mol L $^{-1}$ . The absorption of **1a** was not observed in the region above 500 nm as shown in Fig. 3a. (b) Normalized UV-vis spectra of  $\text{C}_{60}$  ( $0.50 \times 10^{-3}$  mol L $^{-1}$ ) (black line) and the mixture of  $\text{C}_{60}$  ( $0.50 \times 10^{-3}$  mol L $^{-1}$ ) and **1a** ( $2.5 \times 10^{-3}$  mol L $^{-1}$ , 5.0 eq. to  $\text{C}_{60}$ ) (red line) are also shown.

**Table S3.** Changes in Absorbances at 540, 600, and 611 nm at Various Molar Ratios of **1a** and C<sub>60</sub> in Toluene at 298 K in the UV–vis Spectra

| [C <sub>60</sub> ] <sup>a</sup><br>/10 <sup>-3</sup> mol L <sup>-1</sup> | [ <b>1a</b> ]<br>/10 <sup>-3</sup> mol L <sup>-1</sup> | [ <b>1a</b> ]/ [C <sub>60</sub> ] | A <sup>b</sup> |        |        | ΔA = A - A <sub>0</sub> <sup>c</sup> |        |        |
|--------------------------------------------------------------------------|--------------------------------------------------------|-----------------------------------|----------------|--------|--------|--------------------------------------|--------|--------|
|                                                                          |                                                        |                                   | 540 nm         | 600 nm | 611 nm | 540 nm                               | 600 nm | 611 nm |
| 0.50                                                                     | 0                                                      | 0                                 | 0.446          | 0.390  | 0.280  | 0                                    | 0      | 0      |
| 0.50                                                                     | 0.050                                                  | 0.10                              | 0.453          | 0.395  | 0.285  | 0.007                                | 0.005  | 0.005  |
| 0.50                                                                     | 0.099                                                  | 0.20                              | 0.457          | 0.398  | 0.290  | 0.011                                | 0.008  | 0.010  |
| 0.50                                                                     | 0.148                                                  | 0.30                              | 0.467          | 0.405  | 0.297  | 0.021                                | 0.015  | 0.017  |
| 0.50                                                                     | 0.244                                                  | 0.49                              | 0.471          | 0.408  | 0.301  | 0.025                                | 0.018  | 0.021  |
| 0.50                                                                     | 0.338                                                  | 0.68                              | 0.484          | 0.419  | 0.311  | 0.038                                | 0.029  | 0.031  |
| 0.50                                                                     | 0.431                                                  | 0.86                              | 0.493          | 0.425  | 0.318  | 0.047                                | 0.035  | 0.038  |
| 0.50                                                                     | 0.521                                                  | 1.0                               | 0.500          | 0.430  | 0.323  | 0.054                                | 0.040  | 0.043  |
| 0.50                                                                     | 0.610                                                  | 1.2                               | 0.509          | 0.437  | 0.330  | 0.063                                | 0.047  | 0.050  |
| 0.50                                                                     | 0.698                                                  | 1.4                               | 0.515          | 0.441  | 0.335  | 0.069                                | 0.051  | 0.055  |
| 0.50                                                                     | 0.783                                                  | 1.6                               | 0.523          | 0.447  | 0.343  | 0.077                                | 0.057  | 0.063  |
| 0.50                                                                     | 0.909                                                  | 1.8                               | 0.533          | 0.454  | 0.350  | 0.087                                | 0.064  | 0.070  |
| 0.50                                                                     | 1.03                                                   | 2.1                               | 0.545          | 0.462  | 0.359  | 0.099                                | 0.072  | 0.079  |
| 0.50                                                                     | 1.15                                                   | 2.3                               | 0.554          | 0.470  | 0.367  | 0.108                                | 0.080  | 0.087  |
| 0.50                                                                     | 1.30                                                   | 2.6                               | 0.564          | 0.477  | 0.375  | 0.118                                | 0.087  | 0.095  |
| 0.50                                                                     | 1.45                                                   | 2.9                               | 0.578          | 0.487  | 0.385  | 0.132                                | 0.097  | 0.105  |
| 0.50                                                                     | 1.60                                                   | 3.2                               | 0.591          | 0.498  | 0.396  | 0.145                                | 0.108  | 0.116  |
| 0.50                                                                     | 1.74                                                   | 3.5                               | 0.602          | 0.505  | 0.404  | 0.156                                | 0.115  | 0.124  |
| 0.50                                                                     | 1.94                                                   | 3.9                               | 0.621          | 0.520  | 0.419  | 0.175                                | 0.130  | 0.139  |
| 0.50                                                                     | 2.13                                                   | 4.3                               | 0.631          | 0.527  | 0.427  | 0.185                                | 0.137  | 0.147  |
| 0.50                                                                     | 2.31                                                   | 4.6                               | 0.642          | 0.534  | 0.435  | 0.196                                | 0.144  | 0.155  |
| 0.50                                                                     | 2.50                                                   | 5.0                               | 0.653          | 0.542  | 0.444  | 0.207                                | 0.152  | 0.164  |

<sup>a</sup> Concentration of C<sub>60</sub> was fixed at 0.50 × 10<sup>-3</sup> mol L<sup>-1</sup>.

<sup>b</sup> A: observed absorbance. <sup>c</sup> A<sub>0</sub>: absorbance of [C<sub>60</sub>] without **1a** ([**1a**] = 0 mol L<sup>-1</sup>).

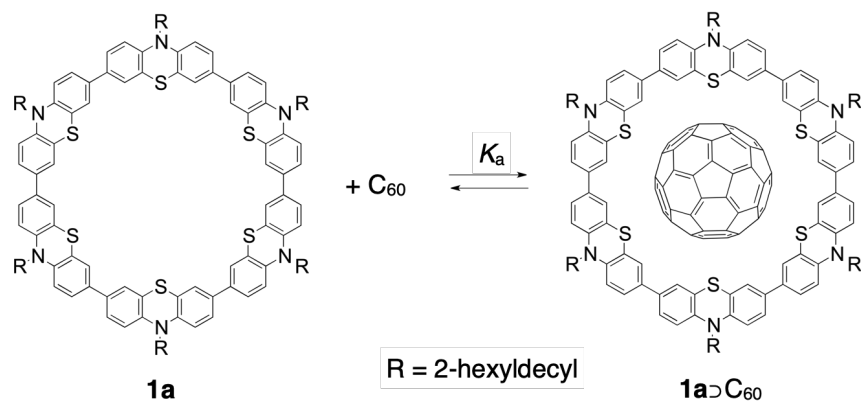

$$\Delta A = \frac{l\Delta\varepsilon}{2K_a} [1 + K_a[\mathbf{1a}]_0 + K_a[\text{C}_{60}]_0 - \{(1 + K_a[\mathbf{1a}]_0 + K_a[\text{C}_{60}]_0)^2 - 4K_a^2[\mathbf{1a}]_0[\text{C}_{60}]_0\}^{1/2}]$$

$\Delta A$  = difference between absorbance of mixture of **1a** and C<sub>60</sub> (A) and that of only C<sub>60</sub> (A<sub>0</sub>)

$l$  = optical path length (= 1 cm)

$\Delta\varepsilon$  = difference between molar absorption coefficient of **1a**⊃C<sub>60</sub> and that of C<sub>60</sub>

$K_a$  = binding constant of **1a** and C<sub>60</sub>

$[\mathbf{1a}]_0$  = initial concentration of **1a** (= (0–2.5) × 10<sup>-3</sup> mol L<sup>-1</sup>)

$[\text{C}_{60}]_0$  = initial concentration of C<sub>60</sub> (= 0.5 × 10<sup>-3</sup> mol L<sup>-1</sup>)

**Figure S13.** Complexation of **1a** with C<sub>60</sub>.

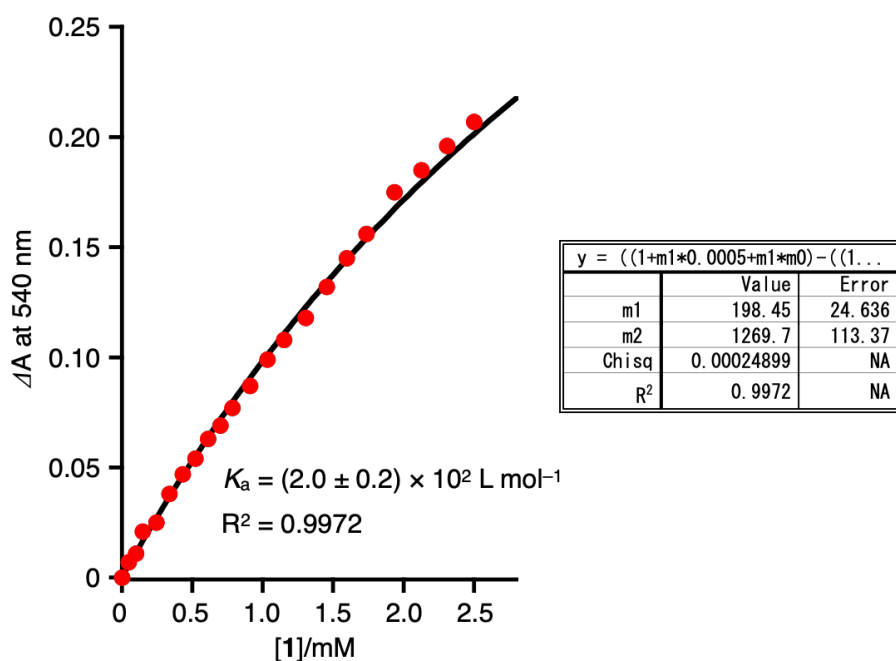

**Figure S14.** Non-linear curve-fitting plot of absorbance changes at 540 nm upon addition of **1a** to C<sub>60</sub> to a 1:1 isotherm in toluene at 298 K.  $[\text{C}_{60}] = 0.50 \times 10^{-3}$  mol L<sup>-1</sup> and  $[\mathbf{1a}] = 0$  to  $2.5 \times 10^{-3}$  mol L<sup>-1</sup>.

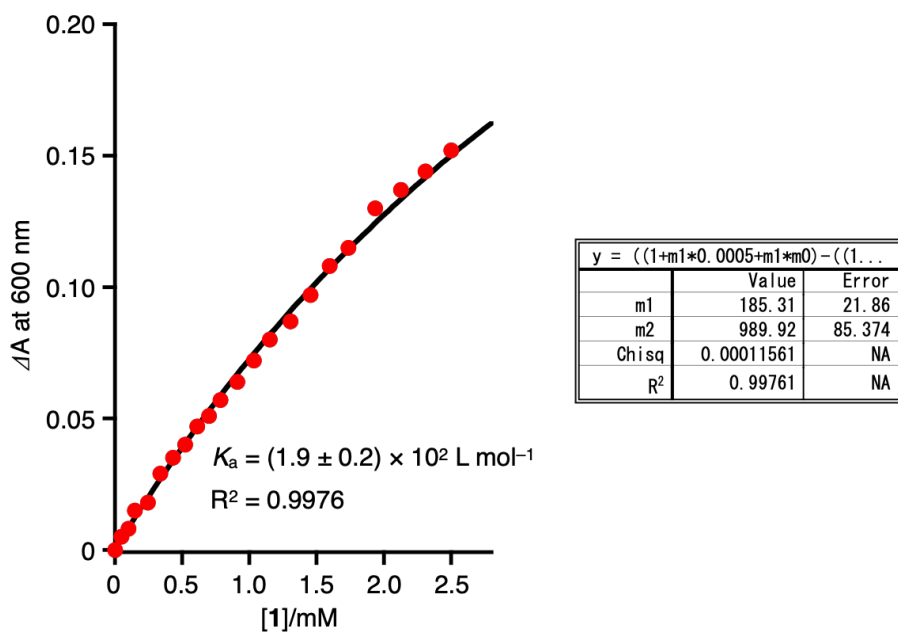

**Figure S15.** Non-linear curve-fitting plot of absorbance changes at 600 nm upon addition of **1a** to  $C_{60}$  to a 1:1 isotherm in toluene at 298 K.  $[C_{60}] = 0.50 \times 10^{-3} \text{ mol L}^{-1}$  and  $[1a] = 0$  to  $2.5 \times 10^{-3} \text{ mol L}^{-1}$ .

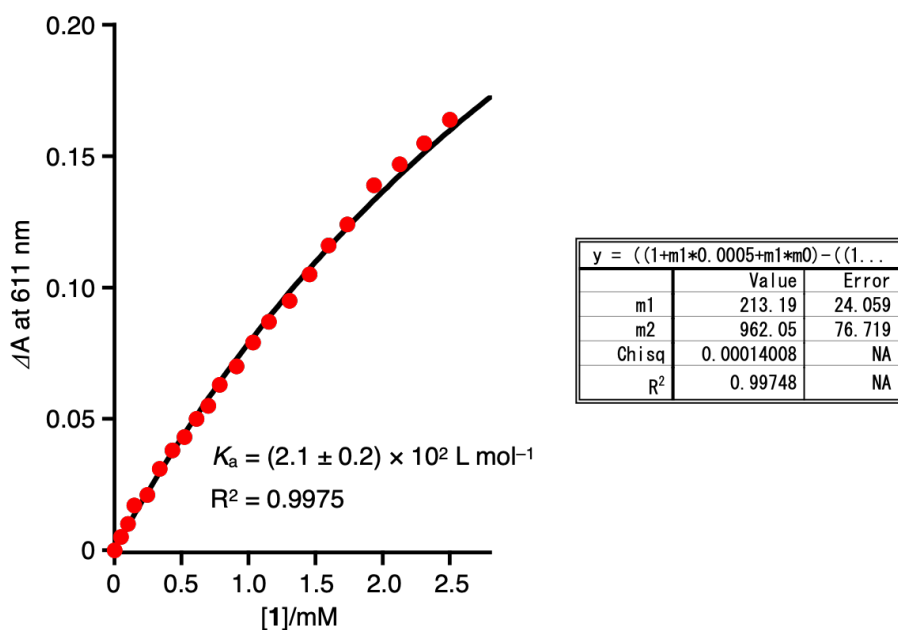

**Figure S16.** Non-linear curve-fitting plot of absorbance changes at 611 nm upon addition of **1a** to  $C_{60}$  to a 1:1 isotherm in toluene at 298 K.  $[C_{60}] = 0.50 \times 10^{-3} \text{ mol L}^{-1}$  and  $[1a] = 0$  to  $2.5 \times 10^{-3} \text{ mol L}^{-1}$ .



**Table S4.** Calculated Thermochemical Energies and Charges for Complexation between **1a'** and C<sub>60</sub> at B3LYP-D3/6-31G(d,p) Level of Theory (gas phase, 1 atm, 298.15 K)

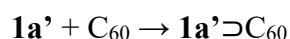

|                | $\Delta E$<br>[kJ mol <sup>-1</sup> ] | $\Delta H_{298}$<br>[kJ mol <sup>-1</sup> ] | $\Delta S_{298}$<br>[J mol <sup>-1</sup> K <sup>-1</sup> ] | $\Delta G_{298}$<br>[kJ mol <sup>-1</sup> ] | Charge<br>(natural) |                    |
|----------------|---------------------------------------|---------------------------------------------|------------------------------------------------------------|---------------------------------------------|---------------------|--------------------|
|                |                                       |                                             |                                                            |                                             | on <b>1a'</b>       | on C <sub>60</sub> |
| uncorrected    | -149.60                               | -142.69                                     | -195.75                                                    | -84.33                                      | -0.0085             | 0.0086             |
| BSSE corrected | -109.39                               | -102.84                                     | -180.27                                                    | -49.10                                      |                     |                    |

**Table S5.** Comparison of Structural Parameters between Calculated **1a'** and **1a'**⊃C<sub>60</sub> at B3LYP-D3/6-31G(d,p) Level of Theory

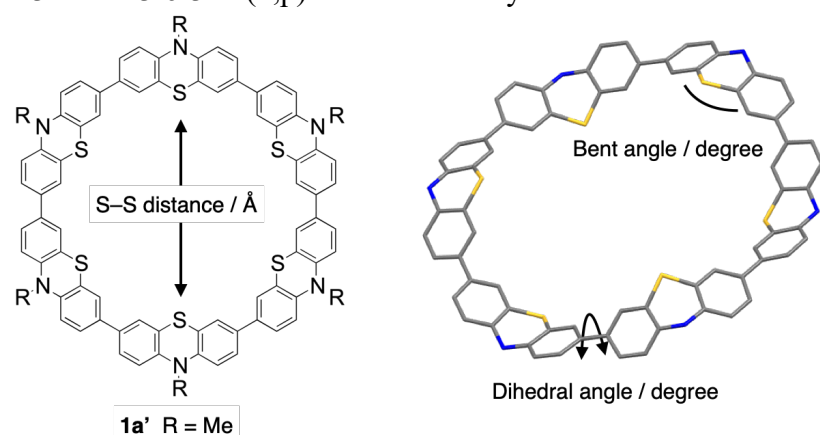

|                                          | S-S distances<br>[Å] | Dihedral angles<br>[degree]          | Bent angles<br>[degree]                    | Mean plane deviation<br>[Å] |
|------------------------------------------|----------------------|--------------------------------------|--------------------------------------------|-----------------------------|
| <b>1a'</b> <sup>a</sup>                  | 14.3, 14.3, 14.3     | 37.3, 37.3, 37.4<br>37.4, 37.4, 37.4 | 143.1, 143.1, 143.1<br>143.1, 143.1, 143.1 | 0.459 <sup>b</sup>          |
| <b>1a'</b> ⊃C <sub>60</sub> <sup>a</sup> | 13.8, 13.8, 13.8     | 33.0, 33.0, 33.1<br>33.1, 33.1, 33.1 | 135.0, 135.0, 135.0<br>135.0, 135.0, 135.0 | 0.528 <sup>c</sup>          |

<sup>a</sup> Nearly *S*<sub>6</sub>-symmetric on phenothiazine cyclic hexamer skeleton. <sup>b</sup> Calculated from the core 84 atoms in phenothiazine cyclic hexamer skeleton of **1a'**. <sup>c</sup> Calculated from the core 84 atoms in phenothiazine cyclic hexamer skeleton of **1a'**⊃C<sub>60</sub>.

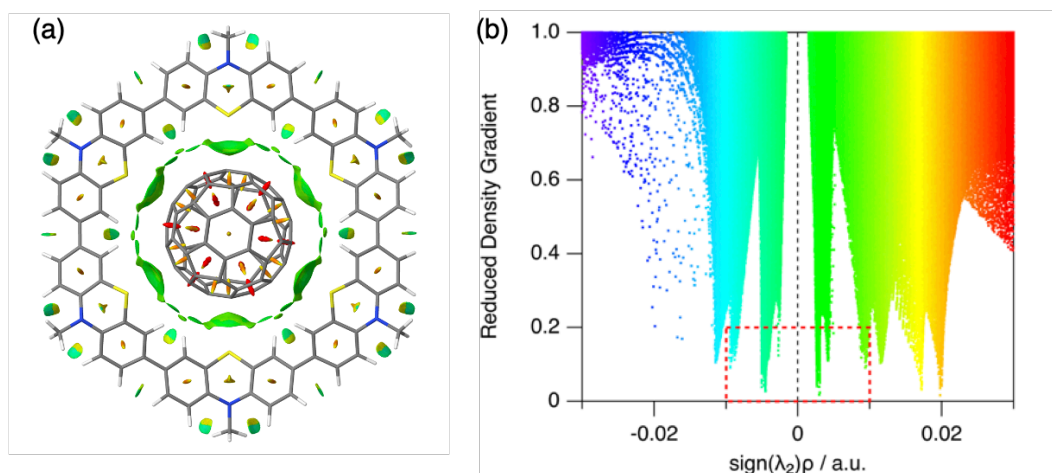

**Figure S17.** (a) NCI plots (isosurface value: 0.5) of **1a'**⊃C<sub>60</sub>. Green isosurface shows regions having noncovalent (van der Waals) interactions. Blue and red isosurfaces show regions having attractive and repulsive interactions, respectively. (b) Reduced density gradient (RDG) plots for SCF density for **1a'**⊃C<sub>60</sub>. Spikes at  $\rho$  below 0.01 a.u. (indicated by red dashed rectangle lines) are due to van der Waals interactions.

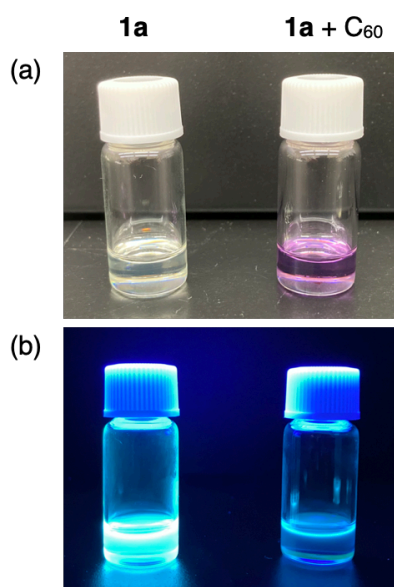

**Figure S18.** Photographic images of **1a** ( $0.50 \times 10^{-4} \text{ mol L}^{-1}$ ) (left) and a mixture of **1a** ( $0.50 \times 10^{-4} \text{ mol L}^{-1}$ ) and C<sub>60</sub> ( $0.50 \times 10^{-3} \text{ mol L}^{-1}$ ) (right) in toluene under (a) room light and (b) black light ( $\lambda = 365 \text{ nm}$ ).

### 3. Synthesis of Compounds

#### *Preparation of N-(2-hexyldecyl)phenothiazine*

To a mixture of 10*H*-phenothiazine (5.87 g, 29.5 mmol) and NaOH (7.39 g, 185 mmol) in DMSO (45 mL) was added dropwise 1-bromo-2-hexyldecane (10.8 g, 35.3 mmol) in DMSO (30 mL). The mixture was stirred at room temperature for 17 h. After addition of water (120 mL), the aqueous phase was extracted with toluene (90 mL × 3). The organic phase was washed with water (90 mL × 3), dried over anhydrous MgSO<sub>4</sub>, and concentrated under reduced pressure. The residue was purified by column chromatography (SiO<sub>2</sub>, hexane) to give *N*-(2-hexyldecyl)phenothiazine (8.61 g, 20.3 mmol, 69%) as colorless oil. <sup>1</sup>H NMR (400 MHz, CDCl<sub>3</sub>): δ 7.16–7.11 (4H, m), 6.90 (2H, t, *J* = 7.5 Hz), 6.8 (2H, d, *J* = 8.0 Hz), 3.71 (2H, d, *J* = 6.6 Hz), 1.97 (1H, sept, *J* = 6.6 Hz), 1.44–1.16 (24H, m), 0.90–0.82 (6H, m). <sup>13</sup>C{<sup>1</sup>H} NMR (125 MHz, CDCl<sub>3</sub>): δ 145.9, 127.6, 127.1, 126.0, 122.4, 116.0, 34.5, 32.0, 31.84, 31.77, 31.76, 30.1, 29.8, 29.6, 29.4, 26.4, 26.3, 22.83, 22.77, 14.3, 14.2. ESI-TOF-MS (positive): *m/z* calcd. for C<sub>28</sub>H<sub>41</sub>NS<sup>+</sup> 423.2954; found 423.2960 [M<sup>+</sup>].

#### *Preparation of 5a*

To a solution of *N*-(2-hexyldecyl)phenothiazine (8.36 g, 19.7 mmol) in CH<sub>2</sub>Cl<sub>2</sub> (50 mL) was added dropwise Br<sub>2</sub> (2.2 mL, 43 mmol) at room temperature under argon atmosphere. The mixture was stirred at room temperature for 2 h. After addition of saturated aqueous NaHSO<sub>3</sub> (50 mL), the aqueous phase was extracted with CH<sub>2</sub>Cl<sub>2</sub> (15 mL × 3). The organic phase was washed with water (30 mL × 3), dried over anhydrous MgSO<sub>4</sub>, and concentrated under reduced pressure. The residue was purified by column chromatography (SiO<sub>2</sub>, hexane) to give **5a** (11.2 g, 19.3 mmol, 98%) as yellow oil. <sup>1</sup>H NMR (400 MHz, CDCl<sub>3</sub>): δ 7.25–7.22 (4H, m), 6.69 (2H, d, *J* = 9.4 Hz), 3.62 (2H, d, *J* = 6.6 Hz), 1.89 (1H, sept, *J* = 6.6 Hz), 1.40–1.14 (24H, m), 0.92–0.82 (6H, m). <sup>13</sup>C{<sup>1</sup>H} NMR (150 MHz, CDCl<sub>3</sub>): δ 144.7, 130.2, 129.9, 127.4, 117.3, 114.9, 51.8, 34.6, 32.0, 31.8, 31.7, 31.6, 30.1, 29.7, 29.5, 29.4, 26.3, 22.83, 22.76, 14.3, 14.2. ESI-TOF-MS (positive): *m/z* calcd. for C<sub>28</sub>H<sub>39</sub>Br<sub>2</sub>NS<sup>+</sup> 581.1146; found 581.1144 [M<sup>+</sup>].

### Preparation of 6a

To a solution of **5a** (2.51 g, 4.32 mmol) in THF (50 mL) was added dropwise a *n*-BuLi hexane solution (1.6 M, 6.0 mL, 9.6 mmol) at  $-78$  °C under argon atmosphere. After the solution was stirred at  $-78$  °C for 1 h, 2-isopropoxy-4,4,5,5-tetramethyl-1,3,2-dioxaborolane (2.0 mL, 9.9 mmol) was added dropwise to the mixture. Then, the mixture was warmed to room temperature and stirred for 21 h. The reaction was quenched by addition of water (50 mL), and the aqueous phase was extracted with  $\text{CH}_2\text{Cl}_2$  (30 mL  $\times$  3). The combined organic phase was washed with water (30 mL  $\times$  3), dried over anhydrous  $\text{MgSO}_4$ , and concentrated under reduced pressure. The residue was purified by column chromatography ( $\text{SiO}_2$ , hexane/ $\text{CH}_2\text{Cl}_2$  = 1:1) to give **6a** (1.61 g, 2.38 mmol, 55%) as yellow oil.  $^1\text{H}$  NMR (400 MHz,  $\text{CDCl}_3$ ):  $\delta$  7.55 (2H, d,  $J$  = 7.9 Hz), 7.54 (2H, s), 6.82 (2H, d,  $J$  = 7.9 Hz), 3.73 (2H, d,  $J$  = 6.5 Hz), 1.94 (1H, sept,  $J$  = 6.5 Hz), 1.32 (24H, s), 1.40–1.14 (24H, m), 0.90–0.81 (6H, m).  $^{13}\text{C}\{^1\text{H}\}$  NMR (150 MHz,  $\text{CDCl}_3$ ):  $\delta$  148.0, 134.02, 133.97, 125.2, 122.6, 115.4, 83.7, 51.6, 34.7, 32.0, 31.8, 31.69, 31.67, 30.0, 29.7, 29.5, 29.4, 26.34, 26.32, 24.9, 22.8, 22.7, 14.3, 14.2. ESI-TOF-MS (positive):  $m/z$  calcd. for  $\text{C}_{40}\text{H}_{63}\text{B}_2\text{NO}_4\text{S}^+$  675.4672; found 675.4666 [ $\text{M}^+$ ].

### Preparation of 7a

A mixture of **5a** (1.76 g, 3.03 mmol), **6a** (676 mg, 1.00 mmol), and  $\text{K}_2\text{CO}_3$  (706 mg, 5.11 mmol) in 1,2-dimethoxyethane (80 mL) and  $\text{H}_2\text{O}$  (40 mL) was bubbled with argon for 1 h.  $\text{Pd}(\text{PPh}_3)_4$  (81 mg, 0.070 mmol) was added to the mixture, and the resulting mixture was refluxed for 2 h under argon atmosphere. After addition of water (150 mL), the aqueous phase was extracted with  $\text{CH}_2\text{Cl}_2$  (50 mL  $\times$  3). The combined organic phase was washed with water (50 mL  $\times$  3), dried over anhydrous  $\text{Na}_2\text{SO}_4$ , and concentrated under reduced pressure. The residue was purified by column chromatography ( $\text{SiO}_2$ , hexane/ $\text{CH}_2\text{Cl}_2$  = 30:1) to give **7a** (548 mg, 0.385 mmol, 39%) as yellow solids.  $^1\text{H}$  NMR (400 MHz,  $\text{THF}-d_8$ ):  $\delta$  7.43–7.36 (8H, m), 7.30–7.25 (4H, m), 7.01 (4H, d,  $J$  = 9.0 Hz), 6.88 (2H, d,  $J$  = 8.7 Hz), 3.84 (2H, d,  $J$  = 6.9 Hz), 3.79 (4H, d,  $J$  = 7.1 Hz), 2.10–1.92 (3H, m), 1.53–1.18 (72H, m), 0.90–0.80 (18H, m).  $^{13}\text{C}\{^1\text{H}\}$  NMR (125 MHz,  $\text{CD}_2\text{Cl}_2$ ):  $\delta$  145.3, 145.0, 144.7, 134.9, 134.5, 130.2, 130.0, 128.1, 126.2, 125.8, 125.7, 125.55, 125.51, 125.49, 117.6, 116.7, 116.5, 114.6, 51.9, 35.0, 34.9, 32.3, 32.2, 32.1, 31.94, 31.90, 30.4, 30.0, 29.90, 29.88, 29.8, 29.7, 26.7, 26.6, 23.15, 23.07, 14.4, 14.3. ESI-TOF-MS (positive):  $m/z$  calcd. for  $\text{C}_{84}\text{H}_{117}\text{Br}_2\text{N}_3\text{S}_3^+$  1423.6764; found 1423.6764 [ $\text{M}^+$ ].

### Preparation of **1a**

A mixture of **7a** (300 mg, 0.211 mmol), 1,5-cyclooctadiene (77 mg, 0.63 mmol), and 2,2'-bipyridine (106 mg, 0.679 mmol) in THF (100 mL) was bubbled with argon for 1 h. Ni(cod)<sub>2</sub> (189 mg, 0.687 mmol) was added to the mixture, and the resulting mixture was refluxed for 2 h under argon atmosphere. After the solvent was removed under reduced pressure, the residue was purified by column chromatography (SiO<sub>2</sub>, hexane/CH<sub>2</sub>Cl<sub>2</sub> = 5:1) and recycling GPC (CHCl<sub>3</sub>, 9.0 mL/min) to give **1a** (51 mg, 20 μmol, 19%) as yellow solids. <sup>1</sup>H NMR (600 MHz, toluene-*d*<sub>8</sub>): δ 7.39 (12H, d, *J* = 2.1 Hz), 7.29 (12H, dd, *J* = 8.5 & 2.1 Hz), 6.82 (12H, d, *J* = 8.5 Hz), 3.68 (12H, d, *J* = 6.6 Hz), 2.21–2.15 (6H, m), 1.55–1.19 (144H, m), 0.94–0.87 (36H, m). <sup>13</sup>C{<sup>1</sup>H} NMR (125 MHz, CD<sub>2</sub>Cl<sub>2</sub>): δ 145.0, 134.7, 126.2, 125.7, 125.4, 116.4, 51.9, 35.0, 32.3, 32.1, 31.99, 31.95, 30.4, 30.1, 29.9, 29.7, 26.6, 23.1, 23.0, 14.29, 14.26. MALDI-TOF-MS (Dithranol, positive): *m/z* 2528.8 [M<sup>+</sup>]. ESI-TOF-MS (positive): *m/z* calcd. for C<sub>168</sub>H<sub>234</sub>N<sub>6</sub>S<sub>6</sub><sup>2+</sup> 1264.3420; found 1264.3384 [M<sup>2+</sup>].

### Preparation of **7b**

A mixture of **5b**<sup>[1]</sup> (1.25 g, 2.63 mmol), **6b**<sup>[1]</sup> (501 mg, 0.880 mmol), and K<sub>2</sub>CO<sub>3</sub> (606 mg, 4.38 mmol) in 1,2-dimethoxyethane (70 mL) and H<sub>2</sub>O (14 mL) was bubbled with argon for 30 min. Then, Pd(PPh<sub>3</sub>)<sub>4</sub> (72 mg, 0.062 mmol) was added to the mixture, and the resulting mixture was refluxed for 2 h under argon atmosphere. The reaction was quenched by addition of water (50 mL), and the aqueous phase was extracted with CH<sub>2</sub>Cl<sub>2</sub> (40 mL × 3). The combined organic phase was washed with water (40 mL × 2), dried over anhydrous Na<sub>2</sub>SO<sub>4</sub>, and concentrated under reduced pressure. The residue was purified by column chromatography (SiO<sub>2</sub>, hexane/CH<sub>2</sub>Cl<sub>2</sub> = 30:1) to give **7b** (437 mg, 0.395 mmol, 45%) as yellow solids. M.p. 231–233 °C. <sup>1</sup>H NMR (500 MHz, CD<sub>2</sub>Cl<sub>2</sub>): δ 7.09 (6H, s), 7.02–6.99 (6H, m), 6.89–6.82 (6H, m), 5.87 (4H, d, *J* = 8.4 Hz), 5.73 (2H, d, *J* = 8.4 Hz), 2.37 (3H, s), 2.36 (6H, s), 2.16 (6H, s), 2.14 (12H, s). <sup>13</sup>C{<sup>1</sup>H} NMR (125 MHz, CD<sub>2</sub>Cl<sub>2</sub>): δ 140.9, 140.4, 140.2, 139.1, 138.9, 138.2, 138.1, 134.9, 134.6, 134.2, 133.8, 130.8, 130.7, 130.2, 128.7, 125.4, 125.2, 124.01, 123.99, 120.9, 119.0, 118.5, 115.7, 114.9, 114.7, 114.0, 21.26, 21.25, 17.92, 17.88. UV-Vis (CH<sub>2</sub>Cl<sub>2</sub>): λ<sub>max</sub> (ε) 272 (69500), 346 (21300), 418 nm (21100). ESI-TOF-MS (positive): *m/z* calcd. for C<sub>63</sub>H<sub>51</sub>Br<sub>2</sub>N<sub>3</sub>S<sub>3</sub><sup>+</sup> 1105.1594; found 1105.1605 [M<sup>+</sup>].

### **Preparation of 1b**

A mixture of **7b** (425 mg, 0.384 mmol), 1,5-cyclooctadiene (113 mg, 1.04 mmol), and 2,2'-bipyridyl (156 mg, 0.999 mmol) in THF (100 mL) was bubbled with argon for 1 h. Ni(cod)<sub>2</sub> (266 mg, 0.967 mmol) was added to the mixture, and the resulting mixture was refluxed for 3 h under argon atmosphere. After the solvent was removed by under reduced pressure, the residue was purified by column chromatography (SiO<sub>2</sub>, hexane/CHCl<sub>3</sub> = 3:1) and washed with toluene and CH<sub>2</sub>Cl<sub>2</sub>. The filtrate was further purified by recycling GPC (CHCl<sub>3</sub>, 9.0 mL/min) to give **1b** (41 mg, 0.022 mmol, 11%) as yellow solids. M.p. > 300 °C. <sup>1</sup>H NMR (400 MHz, THF-*d*<sub>8</sub>): δ 7.28 (12H, d, *J* = 2.3 Hz), 7.11 (12H, s), 6.93 (12H, dd, *J* = 8.7 & 2.3 Hz), 5.91 (12H, d, *J* = 8.7 Hz), 2.36 (18H, s), 2.16 (36H, s). <sup>13</sup>C{<sup>1</sup>H} NMR: Not available due to low solubility. UV-Vis (CH<sub>2</sub>Cl<sub>2</sub>): λ<sub>max</sub> (ε) 287 (165000), 413 nm (58400). MALDI-TOF-MS (Dithranol, positive): *m/z* 1891.4 [M<sup>+</sup>]. ESI-TOF-MS (positive): *m/z* calcd. for C<sub>126</sub>H<sub>102</sub>N<sub>6</sub>S<sub>6</sub><sup>2+</sup> 945.8255; found 945.8227 [M<sup>2+</sup>].

#### 4. X-ray Crystallographic Analysis

All measurements were performed on a Rigaku XtaLAB P100 diffractometer with Mo- $K\alpha$  (0.71075 Å) radiation. Using Olex2<sup>[2]</sup>, the X-ray crystal structures were solved by direct methods (SHELXT<sup>[3]</sup>) and refined by full-matrix least-squares analysis (2018/3<sup>[4]</sup>), using an isotropic extinction correction. All non-hydrogen atoms were refined anisotropically; hydrogen atoms were included in the refinement on calculated positions riding on their carrier atoms. CCDC-2314515 (**1b**) contains the supplementary crystallographic data for this paper.

##### *X-ray crystallographic data for 1b*

**1b**: Crystal data at 130 K for  $C_{126}H_{102}N_6S_6$ ,  $M_r = 1892.49$ , cubic, space group  $Ia-3$  (No. 206),  $D_{\text{calcd}} = 0.696 \text{ g cm}^{-3}$ ,  $Z = 8$ ,  $a = b = c = 33.0600(2) \text{ Å}$ ,  $V = 36133.4(7) \text{ Å}^3$ , Mo- $K\alpha$  radiation,  $\lambda = 0.71073 \text{ Å}$ ,  $\mu = 0.107 \text{ mm}^{-1}$ . A clear dark yellow block crystal (linear dimensions *ca.*  $0.15 \times 0.13 \times 0.09 \text{ mm}^3$ ) was obtained from  $\text{CHCl}_3$ /ethyl acetate at room temperature. Numbers of measured and unique reflections were 266714 and 5514, respectively ( $R_{\text{int}} = 0.0776$ ). Final  $R(F) = 0.0574$ ,  $wR(F^2) = 0.1837$  for 211 parameters and 4297 reflections with  $I > 2\sigma(I)$  (corresponding  $R$  values are 0.0679 and 0.1938, respectively, for all data).

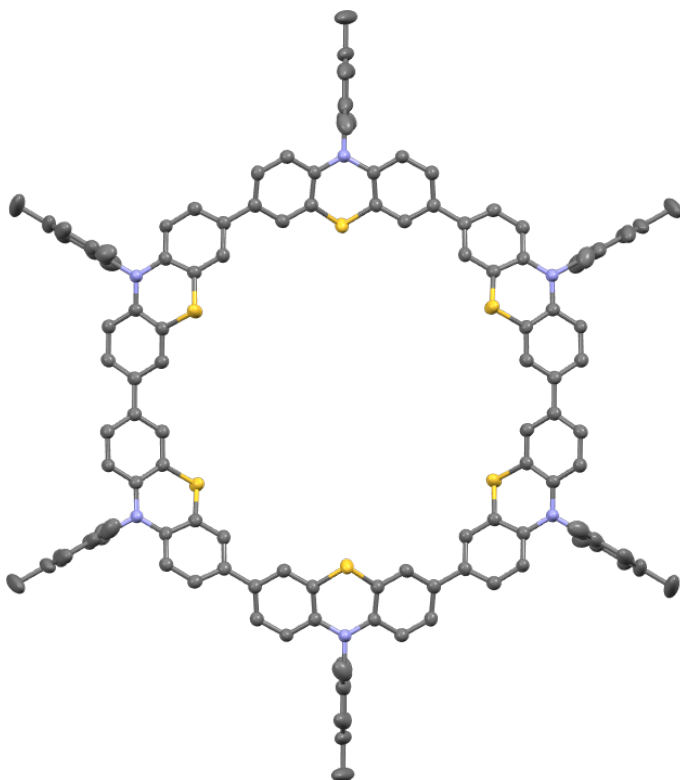

**Figure S19.** ORTEP drawing of **1b** with thermal ellipsoids at 50% probability level. Hydrogen atoms are omitted for clarity.

## 5. Theoretical Calculations

DFT calculations were carried out by Gaussian16 program.<sup>[5]</sup> The optimized structures were obtained by the DFT calculations at the B3LYP-D3/6-31G(d,p) level of theory. Frequency calculations were carried out to ensure that the structures obtained were a minimum, giving no imaginary wavenumber. The molecular orbitals and energies were calculated at the B3LYP-D3/6-31G(d,p) by using the optimized structures, and the given energies were zero-point corrected. The calculations were also carried out with basis set superposition error (BSSE) correction by CP methods. TD-DFT calculations were employed at the B3LYP-D3/6-31+G(d,p) by using the optimized structures. The calculations for the NCI analysis were carried out with NCIPLOT 4.0 program.<sup>[6-8]</sup> The input file (.wfx format) for the optimized structure of **1a'**·C<sub>60</sub> at the B3LYP-D3/6-31G(d,p) level was prepared by the Gaussian program. The output file (.dat format) was used to generate reduced density gradient (RDG) vs. sign( $\lambda_2$ ) $\rho$  plot (Figure S17b). The 3D RDG isosurface (Figure S17a) was visualized by using other output files (grad.cube, dens.cube, and .vmd formats) with Jmol program.<sup>[9]</sup>

**Table S6.** Cartesian Coordinates of **1a'** at the B3LYP-D3/6-31G(d,p) Level

Electronic energy = -5721.676781 hartree

Charge = 0 Multiplicity = 1

| Center<br>Number | Atomic<br>Number | Atomic<br>Type | Coordinates (Angstroms) |           |           |
|------------------|------------------|----------------|-------------------------|-----------|-----------|
|                  |                  |                | X                       | Y         | Z         |
| 1                | 16               | 0              | -6.657876               | -1.867959 | 1.724476  |
| 2                | 6                | 0              | -7.850356               | -0.805149 | 0.932054  |
| 3                | 6                | 0              | -7.123473               | -3.396195 | 0.932208  |
| 4                | 6                | 0              | -9.143596               | -1.300543 | 0.668767  |
| 5                | 6                | 0              | -8.485649               | -3.645755 | 0.668996  |
| 6                | 7                | 0              | -9.449375               | -2.651216 | 0.949347  |
| 7                | 6                | 0              | -7.521984               | 0.516921  | 0.652499  |
| 8                | 6                | 0              | -6.155204               | -4.354418 | 0.652813  |
| 9                | 6                | 0              | -8.473443               | 1.413671  | 0.138157  |
| 10               | 6                | 0              | -6.501244               | -5.615289 | 0.138627  |
| 11               | 6                | 0              | -9.761001               | 0.920261  | -0.110350 |
| 12               | 6                | 0              | -7.857583               | -5.863645 | -0.109994 |
| 13               | 6                | 0              | -10.087708              | -0.412931 | 0.132535  |
| 14               | 6                | 0              | -8.830089               | -4.895035 | 0.132748  |
| 15               | 16               | 0              | -4.947334               | 4.832188  | -1.725899 |
| 16               | 6                | 0              | -4.622786               | 6.396200  | -0.933157 |



|    |    |   |           |           |           |
|----|----|---|-----------|-----------|-----------|
| 17 | 6  | 0 | -6.503191 | 4.471090  | -0.933178 |
| 18 | 6  | 0 | -5.698446 | 7.268370  | -0.669483 |
| 19 | 6  | 0 | -7.400408 | 5.525906  | -0.669497 |
| 20 | 7  | 0 | -7.021102 | 6.857876  | -0.949998 |
| 21 | 6  | 0 | -3.313639 | 6.772666  | -0.653764 |
| 22 | 6  | 0 | -6.848852 | 3.153423  | -0.653779 |
| 23 | 6  | 0 | -3.012686 | 8.044915  | -0.139058 |
| 24 | 6  | 0 | -8.113649 | 2.822670  | -0.139139 |
| 25 | 6  | 0 | -4.083716 | 8.913112  | 0.109966  |
| 26 | 6  | 0 | -9.006886 | 3.873028  | 0.109748  |
| 27 | 6  | 0 | -5.401676 | 8.529565  | -0.132825 |
| 28 | 6  | 0 | -8.654394 | 5.199591  | -0.133003 |
| 29 | 16 | 0 | 1.710952  | 6.699747  | 1.724429  |
| 30 | 6  | 0 | 3.227817  | 7.201210  | 0.932206  |
| 31 | 6  | 0 | 0.620356  | 7.867027  | 0.932005  |
| 32 | 6  | 0 | 3.445280  | 8.568865  | 0.668971  |
| 33 | 6  | 0 | 1.085267  | 9.171522  | 0.668831  |
| 34 | 7  | 0 | 2.428347  | 9.508974  | 0.949472  |
| 35 | 6  | 0 | 4.208592  | 6.255785  | 0.652843  |
| 36 | 6  | 0 | -0.693624 | 7.507605  | 0.652506  |
| 37 | 6  | 0 | 5.460915  | 6.631417  | 0.138559  |
| 38 | 6  | 0 | -1.612505 | 8.437686  | 0.138201  |
| 39 | 6  | 0 | 5.677254  | 7.993186  | -0.110179 |
| 40 | 6  | 0 | -1.149501 | 9.736526  | -0.110272 |
| 41 | 6  | 0 | 4.686039  | 8.942657  | 0.132602  |
| 42 | 6  | 0 | 0.175594  | 10.094484 | 0.132570  |
| 43 | 16 | 0 | 6.657876  | 1.867959  | -1.724476 |
| 44 | 6  | 0 | 7.850356  | 0.805149  | -0.932054 |
| 45 | 6  | 0 | 7.123473  | 3.396195  | -0.932208 |
| 46 | 6  | 0 | 9.143596  | 1.300543  | -0.668767 |
| 47 | 6  | 0 | 8.485649  | 3.645755  | -0.668996 |
| 48 | 7  | 0 | 9.449375  | 2.651216  | -0.949347 |
| 49 | 6  | 0 | 7.521984  | -0.516921 | -0.652499 |
| 50 | 6  | 0 | 6.155204  | 4.354418  | -0.652813 |
| 51 | 6  | 0 | 8.473443  | -1.413671 | -0.138157 |
| 52 | 6  | 0 | 6.501244  | 5.615289  | -0.138627 |
| 53 | 6  | 0 | 9.761001  | -0.920261 | 0.110350  |
| 54 | 6  | 0 | 7.857583  | 5.863645  | 0.109994  |

|    |    |   |            |            |           |
|----|----|---|------------|------------|-----------|
| 55 | 6  | 0 | 10.087708  | 0.412931   | -0.132535 |
| 56 | 6  | 0 | 8.830089   | 4.895035   | -0.132748 |
| 57 | 16 | 0 | 4.947334   | -4.832188  | 1.725899  |
| 58 | 6  | 0 | 4.622786   | -6.396200  | 0.933157  |
| 59 | 6  | 0 | 6.503191   | -4.471090  | 0.933178  |
| 60 | 6  | 0 | 5.698446   | -7.268370  | 0.669483  |
| 61 | 6  | 0 | 7.400408   | -5.525906  | 0.669497  |
| 62 | 7  | 0 | 7.021102   | -6.857876  | 0.949998  |
| 63 | 6  | 0 | 3.313639   | -6.772666  | 0.653764  |
| 64 | 6  | 0 | 6.848852   | -3.153423  | 0.653779  |
| 65 | 6  | 0 | 3.012686   | -8.044915  | 0.139058  |
| 66 | 6  | 0 | 8.113649   | -2.822670  | 0.139139  |
| 67 | 6  | 0 | 4.083716   | -8.913112  | -0.109966 |
| 68 | 6  | 0 | 9.006886   | -3.873028  | -0.109748 |
| 69 | 6  | 0 | 5.401676   | -8.529565  | 0.132825  |
| 70 | 6  | 0 | 8.654394   | -5.199591  | 0.133003  |
| 71 | 16 | 0 | -1.710952  | -6.699747  | -1.724429 |
| 72 | 6  | 0 | -3.227817  | -7.201210  | -0.932206 |
| 73 | 6  | 0 | -0.620356  | -7.867027  | -0.932005 |
| 74 | 6  | 0 | -3.445280  | -8.568865  | -0.668971 |
| 75 | 6  | 0 | -1.085267  | -9.171522  | -0.668831 |
| 76 | 7  | 0 | -2.428347  | -9.508974  | -0.949472 |
| 77 | 6  | 0 | -4.208592  | -6.255785  | -0.652843 |
| 78 | 6  | 0 | 0.693624   | -7.507605  | -0.652506 |
| 79 | 6  | 0 | -5.460915  | -6.631417  | -0.138559 |
| 80 | 6  | 0 | 1.612505   | -8.437686  | -0.138201 |
| 81 | 6  | 0 | -5.677254  | -7.993186  | 0.110179  |
| 82 | 6  | 0 | 1.149501   | -9.736526  | 0.110272  |
| 83 | 6  | 0 | -4.686039  | -8.942657  | -0.132602 |
| 84 | 6  | 0 | -0.175594  | -10.094484 | -0.132570 |
| 85 | 1  | 0 | -6.518820  | 0.865427   | 0.877353  |
| 86 | 1  | 0 | -5.117203  | -4.130051  | 0.877651  |
| 87 | 1  | 0 | -10.510595 | 1.575072   | -0.543785 |
| 88 | 1  | 0 | -8.157096  | -6.812789  | -0.543508 |
| 89 | 1  | 0 | -11.082430 | -0.762051  | -0.118324 |
| 90 | 1  | 0 | -9.861186  | -5.114271  | -0.118309 |
| 91 | 1  | 0 | -2.510258  | 6.078182   | -0.878861 |
| 92 | 1  | 0 | -6.135671  | 2.366684   | -0.878877 |

|     |   |   |            |            |           |
|-----|---|---|------------|------------|-----------|
| 93  | 1 | 0 | -3.891419  | 9.889520   | 0.543791  |
| 94  | 1 | 0 | -9.978519  | 3.657808   | 0.543487  |
| 95  | 1 | 0 | -6.201260  | 9.216381   | 0.118506  |
| 96  | 1 | 0 | -9.359812  | 5.982892   | 0.118197  |
| 97  | 1 | 0 | 4.008765   | 5.212795   | 0.877704  |
| 98  | 1 | 0 | -1.018391  | 6.496509   | 0.877376  |
| 99  | 1 | 0 | 6.619069   | 8.314912   | -0.543756 |
| 100 | 1 | 0 | -1.821806  | 10.470489  | -0.543725 |
| 101 | 1 | 0 | 4.880942   | 9.978613   | -0.118472 |
| 102 | 1 | 0 | 0.501225   | 11.097151  | -0.118342 |
| 103 | 1 | 0 | 6.518820   | -0.865427  | -0.877353 |
| 104 | 1 | 0 | 5.117203   | 4.130051   | -0.877651 |
| 105 | 1 | 0 | 10.510595  | -1.575072  | 0.543785  |
| 106 | 1 | 0 | 8.157096   | 6.812789   | 0.543508  |
| 107 | 1 | 0 | 11.082430  | 0.762051   | 0.118324  |
| 108 | 1 | 0 | 9.861186   | 5.114271   | 0.118309  |
| 109 | 1 | 0 | 2.510258   | -6.078182  | 0.878861  |
| 110 | 1 | 0 | 6.135671   | -2.366684  | 0.878877  |
| 111 | 1 | 0 | 3.891419   | -9.889520  | -0.543791 |
| 112 | 1 | 0 | 9.978519   | -3.657808  | -0.543487 |
| 113 | 1 | 0 | 6.201260   | -9.216381  | -0.118506 |
| 114 | 1 | 0 | 9.359812   | -5.982892  | -0.118197 |
| 115 | 1 | 0 | -4.008765  | -5.212795  | -0.877704 |
| 116 | 1 | 0 | 1.018391   | -6.496509  | -0.877376 |
| 117 | 1 | 0 | -6.619069  | -8.314912  | 0.543756  |
| 118 | 1 | 0 | 1.821806   | -10.470489 | 0.543725  |
| 119 | 1 | 0 | -4.880942  | -9.978613  | 0.118472  |
| 120 | 1 | 0 | -0.501225  | -11.097151 | 0.118342  |
| 121 | 6 | 0 | -10.848042 | -3.043387  | 1.009382  |
| 122 | 1 | 0 | -11.311276 | -3.173468  | 0.019451  |
| 123 | 1 | 0 | -10.930588 | -3.984358  | 1.557107  |
| 124 | 1 | 0 | -11.407783 | -2.282250  | 1.556777  |
| 125 | 6 | 0 | -8.060318  | 7.872832   | -1.008858 |
| 126 | 1 | 0 | -8.403939  | 8.208493   | -0.018523 |
| 127 | 1 | 0 | -7.681723  | 8.738442   | -1.556194 |
| 128 | 1 | 0 | -8.916815  | 7.473792   | -1.556079 |
| 129 | 6 | 0 | 2.787766   | 10.916440  | 1.009418  |
| 130 | 1 | 0 | 3.726695   | 11.020857  | 1.557025  |

|     |   |   |           |            |           |
|-----|---|---|-----------|------------|-----------|
| 131 | 1 | 0 | 2.906842  | 11.382545  | 0.019449  |
| 132 | 1 | 0 | 2.013870  | 11.458267  | 1.556940  |
| 133 | 6 | 0 | 10.848042 | 3.043387   | -1.009382 |
| 134 | 1 | 0 | 11.311276 | 3.173468   | -0.019451 |
| 135 | 1 | 0 | 10.930588 | 3.984358   | -1.557107 |
| 136 | 1 | 0 | 11.407783 | 2.282250   | -1.556777 |
| 137 | 6 | 0 | 8.060318  | -7.872832  | 1.008858  |
| 138 | 1 | 0 | 8.403939  | -8.208493  | 0.018523  |
| 139 | 1 | 0 | 7.681723  | -8.738442  | 1.556194  |
| 140 | 1 | 0 | 8.916815  | -7.473792  | 1.556079  |
| 141 | 6 | 0 | -2.787766 | -10.916440 | -1.009418 |
| 142 | 1 | 0 | -3.726695 | -11.020857 | -1.557025 |
| 143 | 1 | 0 | -2.906842 | -11.382545 | -0.019449 |
| 144 | 1 | 0 | -2.013870 | -11.458267 | -1.556940 |

**Table S7.** Cartesian Coordinates of **1b** at the B3LYP-D3/6-31G(d,p) Level

Electronic energy = -7579.221976 hartree

Charge = 0 Multiplicity = 1

| Center<br>Number | Atomic<br>Number | Atomic<br>Type | Coordinates (Angstroms) |           |           |
|------------------|------------------|----------------|-------------------------|-----------|-----------|
|                  |                  |                | X                       | Y         | Z         |
| 1                | 16               | 0              | -6.855332               | -1.928553 | 1.399514  |
| 2                | 6                | 0              | -8.036867               | -0.849286 | 0.618749  |
| 3                | 6                | 0              | -7.303448               | -3.463641 | 0.616447  |
| 4                | 6                | 0              | -9.309434               | -1.327299 | 0.243948  |
| 5                | 6                | 0              | -8.639279               | -3.717016 | 0.242444  |
| 6                | 7                | 0              | -9.624181               | -2.704447 | 0.288395  |
| 7                | 6                | 0              | -7.719069               | 0.500033  | 0.500518  |
| 8                | 6                | 0              | -6.330101               | -4.450441 | 0.496010  |
| 9                | 6                | 0              | -8.660477               | 1.446621  | 0.064749  |
| 10               | 6                | 0              | -6.642016               | -5.748131 | 0.059130  |
| 11               | 6                | 0              | -9.941753               | 0.976054  | -0.250133 |
| 12               | 6                | 0              | -7.981384               | -6.012642 | -0.254401 |
| 13               | 6                | 0              | -10.257976              | -0.378023 | -0.172242 |
| 14               | 6                | 0              | -8.955848               | -5.020865 | -0.174468 |
| 15               | 16               | 0              | -5.090568               | 4.968549  | -1.384193 |

|    |    |   |           |           |           |
|----|----|---|-----------|-----------|-----------|
| 16 | 6  | 0 | -4.748886 | 6.532918  | -0.605405 |
| 17 | 6  | 0 | -6.646093 | 4.589914  | -0.604832 |
| 18 | 6  | 0 | -5.799973 | 7.396127  | -0.233169 |
| 19 | 6  | 0 | -7.533915 | 5.620216  | -0.232520 |
| 20 | 7  | 0 | -7.149697 | 6.979533  | -0.278331 |
| 21 | 6  | 0 | -3.421741 | 6.933244  | -0.486671 |
| 22 | 6  | 0 | -7.014644 | 3.253660  | -0.485562 |
| 23 | 6  | 0 | -3.073661 | 8.222797  | -0.053039 |
| 24 | 6  | 0 | -8.295317 | 2.875097  | -0.051160 |
| 25 | 6  | 0 | -4.122535 | 9.097087  | 0.259486  |
| 26 | 6  | 0 | -9.194182 | 3.902933  | 0.261574  |
| 27 | 6  | 0 | -5.453023 | 8.693071  | 0.181108  |
| 28 | 6  | 0 | -8.822013 | 5.242663  | 0.182622  |
| 29 | 16 | 0 | 1.763255  | 6.899515  | 1.398449  |
| 30 | 6  | 0 | 3.287231  | 7.384256  | 0.615478  |
| 31 | 6  | 0 | 0.655893  | 8.054297  | 0.616979  |
| 32 | 6  | 0 | 3.508346  | 8.725671  | 0.241024  |
| 33 | 6  | 0 | 1.103128  | 9.337856  | 0.241671  |
| 34 | 7  | 0 | 2.472249  | 9.685829  | 0.286345  |
| 35 | 6  | 0 | 4.297259  | 6.434972  | 0.495492  |
| 36 | 6  | 0 | -0.685365 | 7.703982  | 0.498749  |
| 37 | 6  | 0 | 5.587094  | 6.777973  | 0.058638  |
| 38 | 6  | 0 | -1.654316 | 8.622098  | 0.062440  |
| 39 | 6  | 0 | 5.819271  | 8.123254  | -0.255185 |
| 40 | 6  | 0 | -1.214694 | 9.914127  | -0.253211 |
| 41 | 6  | 0 | 4.804257  | 9.073519  | -0.175686 |
| 42 | 6  | 0 | 0.131342  | 10.262968 | -0.175295 |
| 43 | 16 | 0 | 6.855332  | 1.928553  | -1.399514 |
| 44 | 6  | 0 | 8.036867  | 0.849286  | -0.618749 |
| 45 | 6  | 0 | 7.303448  | 3.463641  | -0.616447 |
| 46 | 6  | 0 | 9.309434  | 1.327299  | -0.243948 |
| 47 | 6  | 0 | 8.639279  | 3.717016  | -0.242444 |
| 48 | 7  | 0 | 9.624181  | 2.704447  | -0.288395 |
| 49 | 6  | 0 | 7.719069  | -0.500033 | -0.500518 |
| 50 | 6  | 0 | 6.330101  | 4.450441  | -0.496010 |
| 51 | 6  | 0 | 8.660477  | -1.446621 | -0.064749 |
| 52 | 6  | 0 | 6.642016  | 5.748131  | -0.059130 |
| 53 | 6  | 0 | 9.941753  | -0.976054 | 0.250133  |

|    |    |   |            |            |           |
|----|----|---|------------|------------|-----------|
| 54 | 6  | 0 | 7.981384   | 6.012642   | 0.254401  |
| 55 | 6  | 0 | 10.257976  | 0.378023   | 0.172242  |
| 56 | 6  | 0 | 8.955848   | 5.020865   | 0.174468  |
| 57 | 16 | 0 | 5.090568   | -4.968549  | 1.384193  |
| 58 | 6  | 0 | 4.748886   | -6.532918  | 0.605405  |
| 59 | 6  | 0 | 6.646093   | -4.589914  | 0.604832  |
| 60 | 6  | 0 | 5.799973   | -7.396127  | 0.233169  |
| 61 | 6  | 0 | 7.533915   | -5.620216  | 0.232520  |
| 62 | 7  | 0 | 7.149697   | -6.979533  | 0.278331  |
| 63 | 6  | 0 | 3.421741   | -6.933244  | 0.486671  |
| 64 | 6  | 0 | 7.014644   | -3.253660  | 0.485562  |
| 65 | 6  | 0 | 3.073661   | -8.222797  | 0.053039  |
| 66 | 6  | 0 | 8.295317   | -2.875097  | 0.051160  |
| 67 | 6  | 0 | 4.122535   | -9.097087  | -0.259486 |
| 68 | 6  | 0 | 9.194182   | -3.902933  | -0.261574 |
| 69 | 6  | 0 | 5.453023   | -8.693071  | -0.181108 |
| 70 | 6  | 0 | 8.822013   | -5.242663  | -0.182622 |
| 71 | 16 | 0 | -1.763255  | -6.899515  | -1.398449 |
| 72 | 6  | 0 | -3.287231  | -7.384256  | -0.615478 |
| 73 | 6  | 0 | -0.655893  | -8.054297  | -0.616979 |
| 74 | 6  | 0 | -3.508346  | -8.725671  | -0.241024 |
| 75 | 6  | 0 | -1.103128  | -9.337856  | -0.241671 |
| 76 | 7  | 0 | -2.472249  | -9.685829  | -0.286345 |
| 77 | 6  | 0 | -4.297259  | -6.434972  | -0.495492 |
| 78 | 6  | 0 | 0.685365   | -7.703982  | -0.498749 |
| 79 | 6  | 0 | -5.587094  | -6.777973  | -0.058638 |
| 80 | 6  | 0 | 1.654316   | -8.622098  | -0.062440 |
| 81 | 6  | 0 | -5.819271  | -8.123254  | 0.255185  |
| 82 | 6  | 0 | 1.214694   | -9.914127  | 0.253211  |
| 83 | 6  | 0 | -4.804257  | -9.073519  | 0.175686  |
| 84 | 6  | 0 | -0.131342  | -10.262968 | 0.175295  |
| 85 | 1  | 0 | -6.728524  | 0.827948   | 0.800706  |
| 86 | 1  | 0 | -5.313232  | -4.215545  | 0.795401  |
| 87 | 1  | 0 | -10.698315 | 1.669937   | -0.603085 |
| 88 | 1  | 0 | -8.266848  | -6.998552  | -0.607865 |
| 89 | 1  | 0 | -11.253974 | -0.705285  | -0.443234 |
| 90 | 1  | 0 | -9.977005  | -5.259331  | -0.444432 |
| 91 | 1  | 0 | -2.641866  | 6.239243   | -0.784991 |

|     |   |   |            |            |           |
|-----|---|---|------------|------------|-----------|
| 92  | 1 | 0 | -6.302418  | 2.490472   | -0.784062 |
| 93  | 1 | 0 | -3.900744  | 10.100004  | 0.610775  |
| 94  | 1 | 0 | -10.191345 | 3.657419   | 0.613455  |
| 95  | 1 | 0 | -6.235024  | 9.392150   | 0.449927  |
| 96  | 1 | 0 | -9.539382  | 6.007882   | 0.451603  |
| 97  | 1 | 0 | 4.086928   | 5.412815   | 0.795135  |
| 98  | 1 | 0 | -0.989361  | 6.705975   | 0.799397  |
| 99  | 1 | 0 | 6.798055   | 8.432325   | -0.608601 |
| 100 | 1 | 0 | -1.926542  | 10.653518  | -0.606760 |
| 101 | 1 | 0 | 5.018036   | 10.100053  | -0.445925 |
| 102 | 1 | 0 | 0.434546   | 11.266401  | -0.446832 |
| 103 | 1 | 0 | 6.728524   | -0.827948  | -0.800706 |
| 104 | 1 | 0 | 5.313232   | 4.215545   | -0.795401 |
| 105 | 1 | 0 | 10.698315  | -1.669937  | 0.603085  |
| 106 | 1 | 0 | 8.266848   | 6.998552   | 0.607865  |
| 107 | 1 | 0 | 11.253974  | 0.705285   | 0.443234  |
| 108 | 1 | 0 | 9.977005   | 5.259331   | 0.444432  |
| 109 | 1 | 0 | 2.641866   | -6.239243  | 0.784991  |
| 110 | 1 | 0 | 6.302418   | -2.490472  | 0.784062  |
| 111 | 1 | 0 | 3.900744   | -10.100004 | -0.610775 |
| 112 | 1 | 0 | 10.191345  | -3.657419  | -0.613455 |
| 113 | 1 | 0 | 6.235024   | -9.392150  | -0.449927 |
| 114 | 1 | 0 | 9.539382   | -6.007882  | -0.451603 |
| 115 | 1 | 0 | -4.086928  | -5.412815  | -0.795135 |
| 116 | 1 | 0 | 0.989361   | -6.705975  | -0.799397 |
| 117 | 1 | 0 | -6.798055  | -8.432325  | 0.608601  |
| 118 | 1 | 0 | 1.926542   | -10.653518 | 0.606760  |
| 119 | 1 | 0 | -5.018036  | -10.100053 | 0.445925  |
| 120 | 1 | 0 | -0.434546  | -11.266401 | 0.446832  |
| 121 | 6 | 0 | -11.002018 | -3.090591  | 0.121067  |
| 122 | 6 | 0 | -11.770530 | -3.299261  | 1.276069  |
| 123 | 6 | 0 | -11.547636 | -3.244312  | -1.165579 |
| 124 | 6 | 0 | -13.109516 | -3.670406  | 1.123199  |
| 125 | 6 | 0 | -12.891046 | -3.616870  | -1.270467 |
| 126 | 6 | 0 | -13.685737 | -3.836634  | -0.140087 |
| 127 | 1 | 0 | -13.716001 | -3.831840  | 2.011252  |
| 128 | 1 | 0 | -13.327086 | -3.736463  | -2.259506 |
| 129 | 6 | 0 | -8.173877  | 7.979357   | -0.114571 |

|     |   |   |            |            |           |
|-----|---|---|------------|------------|-----------|
| 130 | 6 | 0 | -8.746255  | 8.528765   | -1.271593 |
| 131 | 6 | 0 | -8.581163  | 8.378223   | 1.170639  |
| 132 | 6 | 0 | -9.743793  | 9.496569   | -1.122226 |
| 133 | 6 | 0 | -9.581852  | 9.349250   | 1.272011  |
| 134 | 6 | 0 | -10.172067 | 9.920892   | 0.139543  |
| 135 | 1 | 0 | -10.197100 | 9.927384   | -2.011850 |
| 136 | 1 | 0 | -9.908849  | 9.665126   | 2.259905  |
| 137 | 6 | 0 | 2.824984   | 11.072541  | 0.118596  |
| 138 | 6 | 0 | 3.014316   | 11.846413  | 1.273368  |
| 139 | 6 | 0 | 2.966046   | 11.621183  | -1.168198 |
| 140 | 6 | 0 | 3.352931   | 13.193934  | 1.120088  |
| 141 | 6 | 0 | 3.305930   | 12.973215  | -1.273501 |
| 142 | 6 | 0 | 3.505789   | 13.773484  | -0.143378 |
| 143 | 1 | 0 | 3.499131   | 13.804553  | 2.007949  |
| 144 | 1 | 0 | 3.415361   | 13.411600  | -2.262678 |
| 145 | 6 | 0 | 11.002018  | 3.090591   | -0.121067 |
| 146 | 6 | 0 | 11.770530  | 3.299261   | -1.276069 |
| 147 | 6 | 0 | 11.547636  | 3.244312   | 1.165579  |
| 148 | 6 | 0 | 13.109516  | 3.670406   | -1.123199 |
| 149 | 6 | 0 | 12.891046  | 3.616870   | 1.270467  |
| 150 | 6 | 0 | 13.685737  | 3.836634   | 0.140087  |
| 151 | 1 | 0 | 13.716001  | 3.831840   | -2.011252 |
| 152 | 1 | 0 | 13.327086  | 3.736463   | 2.259506  |
| 153 | 6 | 0 | 8.173877   | -7.979357  | 0.114571  |
| 154 | 6 | 0 | 8.746255   | -8.528765  | 1.271593  |
| 155 | 6 | 0 | 8.581163   | -8.378223  | -1.170639 |
| 156 | 6 | 0 | 9.743793   | -9.496569  | 1.122226  |
| 157 | 6 | 0 | 9.581852   | -9.349250  | -1.272011 |
| 158 | 6 | 0 | 10.172067  | -9.920892  | -0.139543 |
| 159 | 1 | 0 | 10.197100  | -9.927384  | 2.011850  |
| 160 | 1 | 0 | 9.908849   | -9.665126  | -2.259905 |
| 161 | 6 | 0 | -2.824984  | -11.072541 | -0.118596 |
| 162 | 6 | 0 | -3.014316  | -11.846413 | -1.273368 |
| 163 | 6 | 0 | -2.966046  | -11.621183 | 1.168198  |
| 164 | 6 | 0 | -3.352931  | -13.193934 | -1.120088 |
| 165 | 6 | 0 | -3.305930  | -12.973215 | 1.273501  |
| 166 | 6 | 0 | -3.505789  | -13.773484 | 0.143378  |
| 167 | 1 | 0 | -3.499131  | -13.804553 | -2.007949 |



|     |   |   |            |            |           |
|-----|---|---|------------|------------|-----------|
| 168 | 1 | 0 | -3.415361  | -13.411600 | 2.262678  |
| 169 | 6 | 0 | -11.151004 | -3.117908  | 2.638757  |
| 170 | 1 | 0 | -10.294988 | -3.787443  | 2.772650  |
| 171 | 1 | 0 | -10.773530 | -2.097819  | 2.765401  |
| 172 | 1 | 0 | -11.875454 | -3.319554  | 3.431668  |
| 173 | 6 | 0 | -10.703040 | -3.008099  | -2.393669 |
| 174 | 1 | 0 | -9.839623  | -3.680878  | -2.414806 |
| 175 | 1 | 0 | -11.283804 | -3.167651  | -3.305385 |
| 176 | 1 | 0 | -10.309049 | -1.986851  | -2.412055 |
| 177 | 6 | 0 | -15.124795 | -4.272400  | -0.281838 |
| 178 | 1 | 0 | -15.201429 | -5.366218  | -0.316686 |
| 179 | 1 | 0 | -15.732116 | -3.930565  | 0.561510  |
| 180 | 1 | 0 | -15.572164 | -3.885663  | -1.202342 |
| 181 | 6 | 0 | -8.286757  | 8.070409   | -2.632630 |
| 182 | 1 | 0 | -7.214640  | 8.249184   | -2.765324 |
| 183 | 1 | 0 | -8.442361  | 6.993683   | -2.757271 |
| 184 | 1 | 0 | -8.825531  | 8.592102   | -3.427457 |
| 185 | 6 | 0 | -7.955175  | 7.768390   | 2.400924  |
| 186 | 1 | 0 | -6.874515  | 7.942364   | 2.422026  |
| 187 | 1 | 0 | -8.387806  | 8.190731   | 3.311108  |
| 188 | 1 | 0 | -8.101614  | 6.683658   | 2.422738  |
| 189 | 6 | 0 | -11.226451 | 10.993308  | 0.277632  |
| 190 | 1 | 0 | -10.769276 | 11.989844  | 0.315436  |
| 191 | 1 | 0 | -11.919651 | 10.985374  | -0.568723 |
| 192 | 1 | 0 | -11.808487 | 10.867674  | 1.195515  |
| 193 | 6 | 0 | 2.847240   | 11.223312  | 2.636254  |
| 194 | 1 | 0 | 1.836351   | 10.821780  | 2.762701  |
| 195 | 1 | 0 | 3.536859   | 10.383495  | 2.770769  |
| 196 | 1 | 0 | 3.031319   | 11.952684  | 3.428925  |
| 197 | 6 | 0 | 2.750922   | 10.770623  | -2.396045 |
| 198 | 1 | 0 | 2.896483   | 11.354801  | -3.307921 |
| 199 | 1 | 0 | 3.444616   | 9.923900   | -2.416703 |
| 200 | 1 | 0 | 1.739615   | 10.351776  | -2.414559 |
| 201 | 6 | 0 | 3.906542   | 15.222653  | -0.285445 |
| 202 | 1 | 0 | 3.547952   | 15.822136  | 0.556561  |
| 203 | 1 | 0 | 4.998236   | 15.326012  | -0.317756 |
| 204 | 1 | 0 | 3.511155   | 15.659654  | -1.207248 |
| 205 | 6 | 0 | 11.151004  | 3.117908   | -2.638757 |

|     |   |   |           |            |           |
|-----|---|---|-----------|------------|-----------|
| 206 | 1 | 0 | 10.294988 | 3.787443   | -2.772650 |
| 207 | 1 | 0 | 10.773530 | 2.097819   | -2.765401 |
| 208 | 1 | 0 | 11.875454 | 3.319554   | -3.431668 |
| 209 | 6 | 0 | 10.703040 | 3.008099   | 2.393669  |
| 210 | 1 | 0 | 9.839623  | 3.680878   | 2.414806  |
| 211 | 1 | 0 | 11.283804 | 3.167651   | 3.305385  |
| 212 | 1 | 0 | 10.309049 | 1.986851   | 2.412055  |
| 213 | 6 | 0 | 15.124795 | 4.272400   | 0.281838  |
| 214 | 1 | 0 | 15.201429 | 5.366218   | 0.316686  |
| 215 | 1 | 0 | 15.732116 | 3.930565   | -0.561510 |
| 216 | 1 | 0 | 15.572164 | 3.885663   | 1.202342  |
| 217 | 6 | 0 | 8.286757  | -8.070409  | 2.632630  |
| 218 | 1 | 0 | 7.214640  | -8.249184  | 2.765324  |
| 219 | 1 | 0 | 8.442361  | -6.993683  | 2.757271  |
| 220 | 1 | 0 | 8.825531  | -8.592102  | 3.427457  |
| 221 | 6 | 0 | 7.955175  | -7.768390  | -2.400924 |
| 222 | 1 | 0 | 6.874515  | -7.942364  | -2.422026 |
| 223 | 1 | 0 | 8.387806  | -8.190731  | -3.311108 |
| 224 | 1 | 0 | 8.101614  | -6.683658  | -2.422738 |
| 225 | 6 | 0 | 11.226451 | -10.993308 | -0.277632 |
| 226 | 1 | 0 | 10.769276 | -11.989844 | -0.315436 |
| 227 | 1 | 0 | 11.919651 | -10.985374 | 0.568723  |
| 228 | 1 | 0 | 11.808487 | -10.867674 | -1.195515 |
| 229 | 6 | 0 | -2.847240 | -11.223312 | -2.636254 |
| 230 | 1 | 0 | -1.836351 | -10.821780 | -2.762701 |
| 231 | 1 | 0 | -3.536859 | -10.383495 | -2.770769 |
| 232 | 1 | 0 | -3.031319 | -11.952684 | -3.428925 |
| 233 | 6 | 0 | -2.750922 | -10.770623 | 2.396045  |
| 234 | 1 | 0 | -2.896483 | -11.354801 | 3.307921  |
| 235 | 1 | 0 | -3.444616 | -9.923900  | 2.416703  |
| 236 | 1 | 0 | -1.739615 | -10.351776 | 2.414559  |
| 237 | 6 | 0 | -3.906542 | -15.222653 | 0.285445  |
| 238 | 1 | 0 | -3.547952 | -15.822136 | -0.556561 |
| 239 | 1 | 0 | -4.998236 | -15.326012 | 0.317756  |
| 240 | 1 | 0 | -3.511155 | -15.659654 | 1.207248  |

---

**Table S8.** Cartesian Coordinates of *N*-Methylphenothiazine at the B3LYP-D3/6-31G(d,p) Level

Electronic energy = -954.781502 hartree

Charge = 0 Multiplicity = 1

| Center<br>Number | Atomic<br>Number | Atomic<br>Type | Coordinates (Angstroms) |           |           |
|------------------|------------------|----------------|-------------------------|-----------|-----------|
|                  |                  |                | X                       | Y         | Z         |
| 1                | 16               | 0              | -0.000000               | -1.814744 | 0.772295  |
| 2                | 6                | 0              | 1.348823                | -0.830099 | 0.146662  |
| 3                | 6                | 0              | -1.348823               | -0.830099 | 0.146662  |
| 4                | 6                | 0              | 1.218187                | 0.573364  | 0.121151  |
| 5                | 6                | 0              | -1.218187               | 0.573364  | 0.121151  |
| 6                | 7                | 0              | 0.000000                | 1.168891  | 0.524283  |
| 7                | 6                | 0              | 2.538753                | -1.440479 | -0.247515 |
| 8                | 6                | 0              | -2.538753               | -1.440479 | -0.247515 |
| 9                | 6                | 0              | 3.635014                | -0.667602 | -0.634861 |
| 10               | 6                | 0              | -3.635015               | -0.667602 | -0.634861 |
| 11               | 6                | 0              | 3.517306                | 0.719895  | -0.659009 |
| 12               | 6                | 0              | -3.517306               | 0.719895  | -0.659009 |
| 13               | 6                | 0              | 2.316024                | 1.336274  | -0.303540 |
| 14               | 6                | 0              | -2.316024               | 1.336274  | -0.303540 |
| 15               | 1                | 0              | 2.606623                | -2.524055 | -0.234042 |
| 16               | 1                | 0              | -2.606623               | -2.524055 | -0.234042 |
| 17               | 1                | 0              | 4.565043                | -1.148954 | -0.919667 |
| 18               | 1                | 0              | -4.565043               | -1.148954 | -0.919667 |
| 19               | 1                | 0              | 4.356305                | 1.334790  | -0.970493 |
| 20               | 1                | 0              | -4.356305               | 1.334790  | -0.970494 |
| 21               | 1                | 0              | 2.238120                | 2.415387  | -0.362688 |
| 22               | 1                | 0              | -2.238120               | 2.415387  | -0.362688 |
| 23               | 6                | 0              | 0.000000                | 2.587880  | 0.840508  |
| 24               | 1                | 0              | 0.884065                | 2.818622  | 1.438420  |
| 25               | 1                | 0              | 0.000000                | 3.238568  | -0.047472 |
| 26               | 1                | 0              | -0.884065               | 2.818622  | 1.438420  |

**Table S9.** Cartesian Coordinates of *N*-Mesityphenothiazine at the B3LYP-D3/6-31G(d,p) Level

Electronic energy = -1264.371706 hartree

Charge = 0 Multiplicity = 1

| Center<br>Number | Atomic<br>Number | Atomic<br>Type | Coordinates (Angstroms) |           |           |
|------------------|------------------|----------------|-------------------------|-----------|-----------|
|                  |                  |                | X                       | Y         | Z         |
| 1                | 16               | 0              | -3.195429               | 0.004090  | 0.763938  |
| 2                | 6                | 0              | -2.250066               | -1.359373 | 0.116838  |
| 3                | 6                | 0              | -2.246174               | 1.366194  | 0.119642  |
| 4                | 6                | 0              | -0.859387               | -1.241814 | -0.085469 |
| 5                | 6                | 0              | -0.855765               | 1.245247  | -0.082684 |
| 6                | 7                | 0              | -0.195888               | 0.000636  | 0.045972  |
| 7                | 6                | 0              | -2.894835               | -2.582177 | -0.073671 |
| 8                | 6                | 0              | -2.887566               | 2.591163  | -0.068349 |
| 9                | 6                | 0              | -2.172083               | -3.728123 | -0.406448 |
| 10               | 6                | 0              | -2.161650               | 3.735877  | -0.398463 |
| 11               | 6                | 0              | -0.791925               | -3.632739 | -0.561721 |
| 12               | 6                | 0              | -0.781707               | 3.637087  | -0.553500 |
| 13               | 6                | 0              | -0.144515               | -2.406108 | -0.415067 |
| 14               | 6                | 0              | -0.137683               | 2.408383  | -0.409345 |
| 15               | 1                | 0              | -3.970577               | -2.634707 | 0.066464  |
| 16               | 1                | 0              | -3.963191               | 2.646305  | 0.071677  |
| 17               | 1                | 0              | -2.683187               | -4.676882 | -0.533291 |
| 18               | 1                | 0              | -2.670154               | 4.686281  | -0.523415 |
| 19               | 1                | 0              | -0.204576               | -4.511974 | -0.808471 |
| 20               | 1                | 0              | -0.191904               | 4.515280  | -0.798115 |
| 21               | 1                | 0              | 0.928892                | -2.350954 | -0.544710 |
| 22               | 1                | 0              | 0.935608                | 2.350570  | -0.538695 |
| 23               | 6                | 0              | 1.244753                | -0.001645 | 0.068713  |
| 24               | 6                | 0              | 1.881297                | -0.010613 | 1.318926  |
| 25               | 6                | 0              | 1.977813                | -0.000755 | -1.131137 |
| 26               | 6                | 0              | 3.278770                | -0.017329 | 1.351788  |
| 27               | 6                | 0              | 3.373494                | -0.007363 | -1.050359 |
| 28               | 6                | 0              | 4.040868                | -0.012971 | 0.179354  |
| 29               | 1                | 0              | 3.782943                | -0.027554 | 2.315226  |
| 30               | 1                | 0              | 3.952830                | -0.009813 | -1.970698 |
| 31               | 6                | 0              | 1.271631                | 0.002683  | -2.464805 |

|    |   |   |          |           |           |
|----|---|---|----------|-----------|-----------|
| 32 | 1 | 0 | 0.630470 | 0.883849  | -2.569969 |
| 33 | 1 | 0 | 1.989670 | 0.001285  | -3.288498 |
| 34 | 1 | 0 | 0.624831 | -0.874140 | -2.571753 |
| 35 | 6 | 0 | 1.061141 | -0.017581 | 2.584184  |
| 36 | 1 | 0 | 0.408336 | 0.860174  | 2.633072  |
| 37 | 1 | 0 | 0.408682 | -0.896114 | 2.623869  |
| 38 | 1 | 0 | 1.701623 | -0.022153 | 3.469603  |
| 39 | 6 | 0 | 5.549669 | 0.015355  | 0.238383  |
| 40 | 1 | 0 | 5.921689 | 1.047216  | 0.257868  |
| 41 | 1 | 0 | 5.925148 | -0.482664 | 1.137218  |
| 42 | 1 | 0 | 5.994464 | -0.474278 | -0.633066 |

**Table S10.** Cartesian Coordinates of C<sub>60</sub> at the B3LYP-D3/6-31G(d,p) Level

Electronic energy = -2285.910695 hartree

Charge = 0 Multiplicity = 1

| Center<br>Number | Atomic<br>Number | Atomic<br>Type | Coordinates (Angstroms) |           |          |
|------------------|------------------|----------------|-------------------------|-----------|----------|
|                  |                  |                | X                       | Y         | Z        |
| 1                | 6                | 0              | -1.176049               | -0.382121 | 3.327454 |
| 2                | 6                | 0              | -0.726838               | 1.000407  | 3.327454 |
| 3                | 6                | 0              | 0.726838                | 1.000407  | 3.327454 |
| 4                | 6                | 0              | -0.000000               | -1.236571 | 3.327454 |
| 5                | 6                | 0              | 1.176049                | -0.382121 | 3.327454 |
| 6                | 6                | 0              | -2.304556               | -0.748796 | 2.594105 |
| 7                | 6                | 0              | -2.304556               | -1.985367 | 1.829862 |
| 8                | 6                | 0              | -3.031395               | -1.749203 | 0.593292 |
| 9                | 6                | 0              | -3.031395               | 0.251611  | 1.829862 |
| 10               | 6                | 0              | -3.480605               | -0.366674 | 0.593292 |
| 11               | 6                | 0              | -1.424294               | 1.960373  | 2.594105 |
| 12               | 6                | 0              | -2.600343               | 1.578251  | 1.829862 |
| 13               | 6                | 0              | -2.600343               | 2.342494  | 0.593292 |
| 14               | 6                | 0              | -0.697456               | 2.960780  | 1.829862 |
| 15               | 6                | 0              | -1.424294               | 3.196944  | 0.593292 |
| 16               | 6                | 0              | 1.424294                | 1.960373  | 2.594105 |
| 17               | 6                | 0              | 0.697456                | 2.960780  | 1.829862 |
| 18               | 6                | 0              | 1.424294                | 3.196944  | 0.593292 |

|    |   |   |           |           |           |
|----|---|---|-----------|-----------|-----------|
| 19 | 6 | 0 | 2.600343  | 1.578251  | 1.829862  |
| 20 | 6 | 0 | 2.600343  | 2.342494  | 0.593292  |
| 21 | 6 | 0 | -0.000000 | -2.423154 | 2.594105  |
| 22 | 6 | 0 | 1.176049  | -2.805275 | 1.829862  |
| 23 | 6 | 0 | 0.726838  | -3.423561 | 0.593292  |
| 24 | 6 | 0 | -1.176049 | -2.805275 | 1.829862  |
| 25 | 6 | 0 | -0.726838 | -3.423561 | 0.593292  |
| 26 | 6 | 0 | 2.304556  | -0.748796 | 2.594105  |
| 27 | 6 | 0 | 3.031395  | 0.251611  | 1.829862  |
| 28 | 6 | 0 | 3.480605  | -0.366674 | 0.593292  |
| 29 | 6 | 0 | 2.304556  | -1.985367 | 1.829862  |
| 30 | 6 | 0 | 3.031395  | -1.749203 | 0.593292  |
| 31 | 6 | 0 | 1.176049  | 0.382121  | -3.327454 |
| 32 | 6 | 0 | 0.000000  | 1.236571  | -3.327454 |
| 33 | 6 | 0 | -1.176049 | 0.382121  | -3.327454 |
| 34 | 6 | 0 | 0.726838  | -1.000407 | -3.327454 |
| 35 | 6 | 0 | -0.726838 | -1.000407 | -3.327454 |
| 36 | 6 | 0 | 2.304556  | 0.748796  | -2.594105 |
| 37 | 6 | 0 | 3.031395  | -0.251611 | -1.829862 |
| 38 | 6 | 0 | 3.480605  | 0.366674  | -0.593292 |
| 39 | 6 | 0 | 2.304556  | 1.985367  | -1.829862 |
| 40 | 6 | 0 | 3.031395  | 1.749203  | -0.593292 |
| 41 | 6 | 0 | 0.000000  | 2.423154  | -2.594105 |
| 42 | 6 | 0 | 1.176049  | 2.805275  | -1.829862 |
| 43 | 6 | 0 | 0.726838  | 3.423561  | -0.593292 |
| 44 | 6 | 0 | -1.176049 | 2.805275  | -1.829862 |
| 45 | 6 | 0 | -0.726838 | 3.423561  | -0.593292 |
| 46 | 6 | 0 | -2.304556 | 0.748796  | -2.594105 |
| 47 | 6 | 0 | -2.304556 | 1.985367  | -1.829862 |
| 48 | 6 | 0 | -3.031395 | 1.749203  | -0.593292 |
| 49 | 6 | 0 | -3.031395 | -0.251611 | -1.829862 |
| 50 | 6 | 0 | -3.480605 | 0.366674  | -0.593292 |
| 51 | 6 | 0 | 1.424294  | -1.960373 | -2.594105 |
| 52 | 6 | 0 | 0.697456  | -2.960780 | -1.829862 |
| 53 | 6 | 0 | 1.424294  | -3.196944 | -0.593292 |
| 54 | 6 | 0 | 2.600343  | -1.578251 | -1.829862 |
| 55 | 6 | 0 | 2.600343  | -2.342494 | -0.593292 |
| 56 | 6 | 0 | -1.424294 | -1.960373 | -2.594105 |

|    |   |   |           |           |           |
|----|---|---|-----------|-----------|-----------|
| 57 | 6 | 0 | -2.600343 | -1.578251 | -1.829862 |
| 58 | 6 | 0 | -2.600343 | -2.342494 | -0.593292 |
| 59 | 6 | 0 | -0.697456 | -2.960780 | -1.829862 |
| 60 | 6 | 0 | -1.424294 | -3.196944 | -0.593292 |

-----

**Table S11.** Cartesian Coordinates of  $1\mathbf{a}'\supset\text{C}_{60}$  at the B3LYP-D3/6-31G(d,p) Level  
 Electronic energy =  $-8007.642893$  hartree  
 Charge = 0 Multiplicity = 1

| Center<br>Number | Atomic<br>Number | Atomic<br>Type | Coordinates (Angstroms) |           |           |
|------------------|------------------|----------------|-------------------------|-----------|-----------|
|                  |                  |                | X                       | Y         | Z         |
| 1                | 16               | 0              | 5.450137                | -3.785025 | 1.933712  |
| 2                | 6                | 0              | 5.435239                | -5.400658 | 1.176425  |
| 3                | 6                | 0              | 6.957736                | -3.209731 | 1.171636  |
| 4                | 6                | 0              | 6.654411                | -6.093645 | 1.036087  |
| 5                | 6                | 0              | 8.031855                | -4.111430 | 1.031658  |
| 6                | 7                | 0              | 7.859608                | -5.460609 | 1.417938  |
| 7                | 6                | 0              | 4.238152                | -5.975056 | 0.766162  |
| 8                | 6                | 0              | 7.078626                | -1.888266 | 0.758694  |
| 9                | 6                | 0              | 4.201512                | -7.271527 | 0.225766  |
| 10               | 6                | 0              | 8.280430                | -1.403601 | 0.215570  |
| 11               | 6                | 0              | 5.414938                | -7.962564 | 0.106217  |
| 12               | 6                | 0              | 9.350407                | -2.300749 | 0.095225  |
| 13               | 6                | 0              | 6.621289                | -7.384697 | 0.493387  |
| 14               | 6                | 0              | 9.229397                | -3.632036 | 0.485215  |
| 15               | 16               | 0              | -0.553139               | -6.611975 | -1.932824 |
| 16               | 6                | 0              | -1.959589               | -7.406587 | -1.174935 |
| 17               | 6                | 0              | 0.699096                | -7.629877 | -1.170946 |
| 18               | 6                | 0              | -1.950114               | -8.808888 | -1.034192 |
| 19               | 6                | 0              | 0.455178                | -9.010871 | -1.030472 |
| 20               | 7                | 0              | -0.799488               | -9.536262 | -1.416329 |
| 21               | 6                | 0              | -3.055653               | -6.657019 | -0.764899 |
| 22               | 6                | 0              | 1.904118                | -7.073853 | -0.758440 |
| 23               | 6                | 0              | -4.196650               | -7.273499 | -0.224267 |
| 24               | 6                | 0              | 2.924702                | -7.872198 | -0.215061 |
| 25               | 6                | 0              | -4.188198               | -8.669814 | -0.104014 |

|    |    |   |           |           |           |
|----|----|---|-----------|-----------|-----------|
| 26 | 6  | 0 | 2.682631  | -9.247344 | -0.094251 |
| 27 | 6  | 0 | -3.084552 | -9.425641 | -0.490999 |
| 28 | 6  | 0 | 1.469122  | -9.808200 | -0.483955 |
| 29 | 16 | 0 | -6.004981 | -2.827012 | 1.934605  |
| 30 | 6  | 0 | -7.396083 | -2.006338 | 1.176113  |
| 31 | 6  | 0 | -6.259596 | -4.420144 | 1.171880  |
| 32 | 6  | 0 | -8.605543 | -2.715877 | 1.034326  |
| 33 | 6  | 0 | -7.577342 | -4.899697 | 1.030580  |
| 34 | 7  | 0 | -8.660146 | -4.076186 | 1.415931  |
| 35 | 6  | 0 | -7.294866 | -0.682299 | 0.766260  |
| 36 | 6  | 0 | -5.175097 | -5.185235 | 0.759643  |
| 37 | 6  | 0 | -8.398864 | -0.002497 | 0.224740  |
| 38 | 6  | 0 | -5.355553 | -6.468237 | 0.216011  |
| 39 | 6  | 0 | -9.603736 | -0.708078 | 0.103658  |
| 40 | 6  | 0 | -6.667305 | -6.946516 | 0.094451  |
| 41 | 6  | 0 | -9.706605 | -2.041818 | 0.490516  |
| 42 | 6  | 0 | -7.760208 | -6.176390 | 0.483653  |
| 43 | 16 | 0 | -5.450063 | 3.785200  | -1.933641 |
| 44 | 6  | 0 | -5.435186 | 5.400745  | -1.176168 |
| 45 | 6  | 0 | -6.957706 | 3.209844  | -1.171702 |
| 46 | 6  | 0 | -6.654356 | 6.093733  | -1.035828 |
| 47 | 6  | 0 | -8.031828 | 4.111540  | -1.031708 |
| 48 | 7  | 0 | -7.859536 | 5.460757  | -1.417830 |
| 49 | 6  | 0 | -4.238115 | 5.975084  | -0.765775 |
| 50 | 6  | 0 | -7.078632 | 1.888345  | -0.758885 |
| 51 | 6  | 0 | -4.201486 | 7.271501  | -0.225251 |
| 52 | 6  | 0 | -8.280474 | 1.403641  | -0.215881 |
| 53 | 6  | 0 | -5.414912 | 7.962537  | -0.105685 |
| 54 | 6  | 0 | -9.350459 | 2.300781  | -0.095541 |
| 55 | 6  | 0 | -6.621249 | 7.384724  | -0.492978 |
| 56 | 6  | 0 | -9.229415 | 3.632102  | -0.485403 |
| 57 | 16 | 0 | 0.553258  | 6.611772  | 1.933118  |
| 58 | 6  | 0 | 1.959646  | 7.406435  | 1.175162  |
| 59 | 6  | 0 | -0.699032 | 7.629740  | 1.171414  |
| 60 | 6  | 0 | 1.950167  | 8.808748  | 1.034534  |
| 61 | 6  | 0 | -0.455116 | 9.010741  | 1.031029  |
| 62 | 7  | 0 | 0.799580  | 9.536097  | 1.416842  |
| 63 | 6  | 0 | 3.055666  | 6.656894  | 0.764959  |



|     |    |   |           |            |           |
|-----|----|---|-----------|------------|-----------|
| 64  | 6  | 0 | -1.904077 | 7.073747   | 0.758927  |
| 65  | 6  | 0 | 4.196616  | 7.273408   | 0.224266  |
| 66  | 6  | 0 | -2.924677 | 7.872131   | 0.215637  |
| 67  | 6  | 0 | 4.188158  | 8.669734   | 0.104124  |
| 68  | 6  | 0 | -2.682612 | 9.247289   | 0.094931  |
| 69  | 6  | 0 | 3.084555  | 9.425536   | 0.491278  |
| 70  | 6  | 0 | -1.469088 | 9.808116   | 0.484628  |
| 71  | 16 | 0 | 6.004806  | 2.826997   | -1.934909 |
| 72  | 6  | 0 | 7.395958  | 2.006329   | -1.176502 |
| 73  | 6  | 0 | 6.259462  | 4.420126   | -1.172186 |
| 74  | 6  | 0 | 8.605427  | 2.715871   | -1.034812 |
| 75  | 6  | 0 | 7.577216  | 4.899681   | -1.030977 |
| 76  | 7  | 0 | 8.659994  | 4.076179   | -1.416430 |
| 77  | 6  | 0 | 7.294765  | 0.682302   | -0.766605 |
| 78  | 6  | 0 | 5.174991  | 5.185198   | -0.759838 |
| 79  | 6  | 0 | 8.398796  | 0.002513   | -0.225141 |
| 80  | 6  | 0 | 5.355484  | 6.468179   | -0.216169 |
| 81  | 6  | 0 | 9.603683  | 0.708091   | -0.104175 |
| 82  | 6  | 0 | 6.667244  | 6.946463   | -0.094703 |
| 83  | 6  | 0 | 9.706530  | 2.041820   | -0.491075 |
| 84  | 6  | 0 | 7.760120  | 6.176359   | -0.484026 |
| 85  | 6  | 0 | 9.045080  | -6.284048  | 1.588413  |
| 86  | 6  | 0 | -0.920003 | -10.974667 | -1.586444 |
| 87  | 6  | 0 | -9.966130 | -4.691326  | 1.584619  |
| 88  | 6  | 0 | -9.044984 | 6.284229   | -1.588314 |
| 89  | 6  | 0 | 0.920114  | 10.974487  | 1.587062  |
| 90  | 6  | 0 | 9.965964  | 4.691329   | -1.585196 |
| 91  | 1  | 0 | 3.319139  | -5.412930  | 0.895265  |
| 92  | 1  | 0 | 6.232251  | -1.221800  | 0.889135  |
| 93  | 1  | 0 | 5.427817  | -8.950342  | -0.343324 |
| 94  | 1  | 0 | 10.280062 | -1.969673  | -0.356551 |
| 95  | 1  | 0 | 7.541414  | -7.936504  | 0.341006  |
| 96  | 1  | 0 | 10.066716 | -4.302822  | 0.332623  |
| 97  | 1  | 0 | -3.028560 | -5.580097  | -0.894445 |
| 98  | 1  | 0 | 2.058215  | -6.007701  | -0.889233 |
| 99  | 1  | 0 | -5.037107 | -9.174741  | 0.345825  |
| 100 | 1  | 0 | 3.434126  | -9.886838  | 0.357718  |
| 101 | 1  | 0 | -3.102188 | -10.498348 | -0.338215 |

|     |   |   |            |            |           |
|-----|---|---|------------|------------|-----------|
| 102 | 1 | 0 | 1.306807   | -10.868694 | -0.331100 |
| 103 | 1 | 0 | -6.348857  | -0.167227  | 0.896595  |
| 104 | 1 | 0 | -4.174933  | -4.785244  | 0.890919  |
| 105 | 1 | 0 | -10.465195 | -0.225451  | -0.346810 |
| 106 | 1 | 0 | -6.844863  | -7.917055  | -0.357766 |
| 107 | 1 | 0 | -10.644267 | -2.562947  | 0.337001  |
| 108 | 1 | 0 | -8.759556  | -6.566310  | 0.330006  |
| 109 | 1 | 0 | -3.319103  | 5.412957   | -0.894884 |
| 110 | 1 | 0 | -6.232255  | 1.221882   | -0.889329 |
| 111 | 1 | 0 | -5.427802  | 8.950270   | 0.343955  |
| 112 | 1 | 0 | -10.280148 | 1.969667   | 0.356138  |
| 113 | 1 | 0 | -7.541377  | 7.936523   | -0.340583 |
| 114 | 1 | 0 | -10.066742 | 4.302880   | -0.332813 |
| 115 | 1 | 0 | 3.028571   | 5.579963   | 0.894414  |
| 116 | 1 | 0 | -2.058155  | 6.007585   | 0.889651  |
| 117 | 1 | 0 | 5.037026   | 9.174693   | -0.345756 |
| 118 | 1 | 0 | -3.434122  | 9.886816   | -0.356965 |
| 119 | 1 | 0 | 3.102183   | 10.498255  | 0.338580  |
| 120 | 1 | 0 | -1.306778  | 10.868622  | 0.331850  |
| 121 | 1 | 0 | 6.348741   | 0.167235   | -0.896846 |
| 122 | 1 | 0 | 4.174820   | 4.785204   | -0.891044 |
| 123 | 1 | 0 | 10.465173  | 0.225473   | 0.346243  |
| 124 | 1 | 0 | 6.844835   | 7.916983   | 0.357539  |
| 125 | 1 | 0 | 10.644207  | 2.562948   | -0.337645 |
| 126 | 1 | 0 | 8.759477   | 6.566280   | -0.330447 |
| 127 | 1 | 0 | 9.501357   | -6.603378  | 0.638604  |
| 128 | 1 | 0 | 9.788333   | -5.721941  | 2.157662  |
| 129 | 1 | 0 | 8.778637   | -7.174833  | 2.161082  |
| 130 | 1 | 0 | -0.968094  | -11.529302 | -0.636518 |
| 131 | 1 | 0 | -1.824873  | -11.189357 | -2.158766 |
| 132 | 1 | 0 | -0.061789  | -11.337411 | -2.155931 |
| 133 | 1 | 0 | -10.605187 | -4.015334  | 2.156523  |
| 134 | 1 | 0 | -10.469508 | -4.926730  | 0.634093  |
| 135 | 1 | 0 | -9.851584  | -5.616101  | 2.153915  |
| 136 | 1 | 0 | -9.501338  | 6.603462   | -0.638508 |
| 137 | 1 | 0 | -9.788197  | 5.722190   | -2.157683 |
| 138 | 1 | 0 | -8.778485  | 7.175072   | -2.160866 |
| 139 | 1 | 0 | 0.968139   | 11.529199  | 0.637177  |

|     |   |   |           |           |           |
|-----|---|---|-----------|-----------|-----------|
| 140 | 1 | 0 | 1.825027  | 11.189127 | 2.159334  |
| 141 | 1 | 0 | 0.061942  | 11.337190 | 2.156639  |
| 142 | 1 | 0 | 10.604984 | 4.015352  | -2.157158 |
| 143 | 1 | 0 | 10.469405 | 4.926715  | -0.634699 |
| 144 | 1 | 0 | 9.851373  | 5.616115  | -2.154465 |
| 145 | 6 | 0 | 2.927341  | -0.686464 | 1.891564  |
| 146 | 6 | 0 | 1.997933  | -1.676557 | 2.410909  |
| 147 | 6 | 0 | 1.029902  | -0.986787 | 3.248780  |
| 148 | 6 | 0 | 2.534183  | 0.614426  | 2.408617  |
| 149 | 6 | 0 | 1.361856  | 0.428566  | 3.248036  |
| 150 | 6 | 0 | 3.411635  | -0.800768 | 0.587171  |
| 151 | 6 | 0 | 3.523711  | 0.382356  | -0.251971 |
| 152 | 6 | 0 | 3.167330  | 0.003778  | -1.610256 |
| 153 | 6 | 0 | 2.985361  | -1.909645 | -0.251415 |
| 154 | 6 | 0 | 2.833123  | -1.412466 | -1.608415 |
| 155 | 6 | 0 | 1.589625  | -2.741600 | 1.606574  |
| 156 | 6 | 0 | 2.093449  | -2.860568 | 0.247404  |
| 157 | 6 | 0 | 1.011278  | -3.354714 | -0.590048 |
| 158 | 6 | 0 | 0.196013  | -3.160245 | 1.606977  |
| 159 | 6 | 0 | -0.160743 | -3.540217 | 0.250482  |
| 160 | 6 | 0 | -0.306137 | -1.389402 | 3.250127  |
| 161 | 6 | 0 | -0.732270 | -2.498697 | 2.412708  |
| 162 | 6 | 0 | -2.056094 | -2.189468 | 1.896784  |
| 163 | 6 | 0 | -1.365927 | -0.394325 | 3.250899  |
| 164 | 6 | 0 | -2.448296 | -0.888883 | 2.414904  |
| 165 | 6 | 0 | 2.641600  | 1.749348  | 1.603055  |
| 166 | 6 | 0 | 1.582179  | 2.746890  | 1.604774  |
| 167 | 6 | 0 | 1.431056  | 3.243131  | 0.246046  |
| 168 | 6 | 0 | 3.146785  | 1.630888  | 0.245688  |
| 169 | 6 | 0 | 2.398808  | 2.553524  | -0.593303 |
| 170 | 6 | 0 | 0.345188  | 1.384339  | 3.248786  |
| 171 | 6 | 0 | -1.046458 | 0.963990  | 3.249937  |
| 172 | 6 | 0 | -1.795000 | 1.886576  | 2.412189  |
| 173 | 6 | 0 | 0.457082  | 2.567850  | 2.411026  |
| 174 | 6 | 0 | -0.865915 | 2.877779  | 1.893978  |
| 175 | 6 | 0 | -2.927325 | 0.686500  | -1.891630 |
| 176 | 6 | 0 | -2.534165 | -0.614392 | -2.408682 |
| 177 | 6 | 0 | -1.361837 | -0.428531 | -3.248101 |

|     |   |   |           |           |           |
|-----|---|---|-----------|-----------|-----------|
| 178 | 6 | 0 | -1.997915 | 1.676592  | -2.410976 |
| 179 | 6 | 0 | -1.029883 | 0.986822  | -3.248846 |
| 180 | 6 | 0 | -3.411616 | 0.800803  | -0.587233 |
| 181 | 6 | 0 | -2.985341 | 1.909682  | 0.251351  |
| 182 | 6 | 0 | -2.833101 | 1.412503  | 1.608351  |
| 183 | 6 | 0 | -3.523694 | -0.382320 | 0.251909  |
| 184 | 6 | 0 | -3.167308 | -0.003740 | 1.610192  |
| 185 | 6 | 0 | -2.641583 | -1.749314 | -1.603120 |
| 186 | 6 | 0 | -3.146770 | -1.630855 | -0.245750 |
| 187 | 6 | 0 | -2.398790 | -2.553492 | 0.593239  |
| 188 | 6 | 0 | -1.582161 | -2.746857 | -1.604838 |
| 189 | 6 | 0 | -1.431035 | -3.243094 | -0.246110 |
| 190 | 6 | 0 | -0.345168 | -1.384305 | -3.248850 |
| 191 | 6 | 0 | -0.457062 | -2.567815 | -2.411091 |
| 192 | 6 | 0 | 0.865936  | -2.877740 | -1.894043 |
| 193 | 6 | 0 | 1.046478  | -0.963954 | -3.250002 |
| 194 | 6 | 0 | 1.795021  | -1.886538 | -2.412253 |
| 195 | 6 | 0 | -1.589602 | 2.741633  | -1.606641 |
| 196 | 6 | 0 | -0.195991 | 3.160281  | -1.607045 |
| 197 | 6 | 0 | 0.160766  | 3.540251  | -0.250549 |
| 198 | 6 | 0 | -2.093425 | 2.860601  | -0.247473 |
| 199 | 6 | 0 | -1.011254 | 3.354748  | 0.589979  |
| 200 | 6 | 0 | 0.306157  | 1.389437  | -3.250193 |
| 201 | 6 | 0 | 1.365948  | 0.394361  | -3.250963 |
| 202 | 6 | 0 | 2.448317  | 0.888919  | -2.414967 |
| 203 | 6 | 0 | 0.732291  | 2.498733  | -2.412774 |
| 204 | 6 | 0 | 2.056115  | 2.189503  | -1.896849 |

---

## 6. Job's Plot Experiments by NMR

A solution of **1a** in toluene-*d*<sub>8</sub> ( $1.00 \times 10^{-3}$  mol L<sup>-1</sup>, **A**) and a solution of C<sub>60</sub> in toluene-*d*<sub>8</sub> ( $1.00 \times 10^{-3}$  mol L<sup>-1</sup>, **B**) were prepared. Mixing the two solutions **A** and **B** gave a solution of **1a** and C<sub>60</sub> at the constant total concentration  $C$  ( $= 1.00 \times 10^{-3}$  mol L<sup>-1</sup>) with variable molar fractions of **1a** ( $x$ ).

$$\text{Total concentration: } [\mathbf{1a}] + [\text{C}_{60}] = C$$

$$\text{Molar fraction of } \mathbf{1a}: [\mathbf{1a}]/([\mathbf{1a}] + [\text{C}_{60}]) = [\mathbf{1a}]/C = x$$

$$\text{Molar fraction of C}_{60}: [\text{C}_{60}]/([\mathbf{1a}] + [\text{C}_{60}]) = [\text{C}_{60}]/C = 1 - x$$

<sup>1</sup>H NMR of the mixed solutions were measured at 298 K. The observed chemical shifts were referenced to the residual solvent signal of toluene at  $\delta$  2.08 (Figure S11a and Table S2). From the observed spectra, the differences of the chemical shifts  $\Delta\delta$  ( $= \delta - \delta_0$ ), where  $\delta$  and  $\delta_0$  are the chemical shifts at  $[\mathbf{1a}]/C = x$  and 0, respectively, were read for the signals derived from the H<sub>1</sub>, H<sub>2</sub>, and H<sub>3</sub> protons. The Job's plot for the H<sub>3</sub> signal was obtained by plotting  $\Delta\delta \times x$  versus  $x$  (Figure S11b). The Job's plot shows a maximum at  $x = 0.5$  all for H<sub>1</sub>, H<sub>2</sub>, and H<sub>3</sub>, indicating the stoichiometric ratio of **1a** and C<sub>60</sub> is 1:1. The parameters obtained from H<sub>3</sub> proton were adopted because of the largest changes in chemical shifts.

## 7. Titration Experiments by UV-vis

A solution of C<sub>60</sub> in toluene ( $0.50 \times 10^{-3}$  mol L<sup>-1</sup>, **A**) and a mixture solution of C<sub>60</sub> and **1a** in toluene ( $0.50 \times 10^{-3}$  mol L<sup>-1</sup> for C<sub>60</sub> and  $10 \times 10^{-3}$  mol L<sup>-1</sup> for **1a**, **B**) were prepared. To the solution **A** (3.0 mL), the solution **B** (0–1.0 mL) was added giving the sample solution, in which the concentration of C<sub>60</sub> was fixed at  $0.50 \times 10^{-3}$  mol L<sup>-1</sup> with various concentrations of **1a** ( $0$ – $2.5 \times 10^{-3}$  mol L<sup>-1</sup>), and the UV-vis spectra of the resulting mixtures were measured at 298 K (Fig. S12). The absorbances at 540, 600, and 611 nm were monitored (Table S3):  $A$  is the absorbance of the mixture of **1a** and C<sub>60</sub>,  $A_0$  is the absorbance of only C<sub>60</sub>, and  $\Delta A$  ( $= A - A_0$ ) is the differences between  $A$  and  $A_0$ . The binding constant ( $K_a$ ) at 298 K was estimated by curve fitting method (Fig. S13) using the results of the UV-vis measurements, and the following  $K_a$  values were obtained:

$$K_a = (2.0 \pm 0.2) \times 10^2 \text{ L mol}^{-1} \text{ (540 nm) (Fig. S14)}$$

$$K_a = (1.9 \pm 0.2) \times 10^2 \text{ L mol}^{-1} \text{ (600 nm) (Fig. S15)}$$

$$K_a = (2.1 \pm 0.2) \times 10^2 \text{ L mol}^{-1} \text{ (611 nm) (Fig. S16)}$$

We adopted the value obtained at 540 nm in the main text because of the largest changes in absorbance.

## 8. $^1\text{H}$ and $^{13}\text{C}$ NMR Spectra

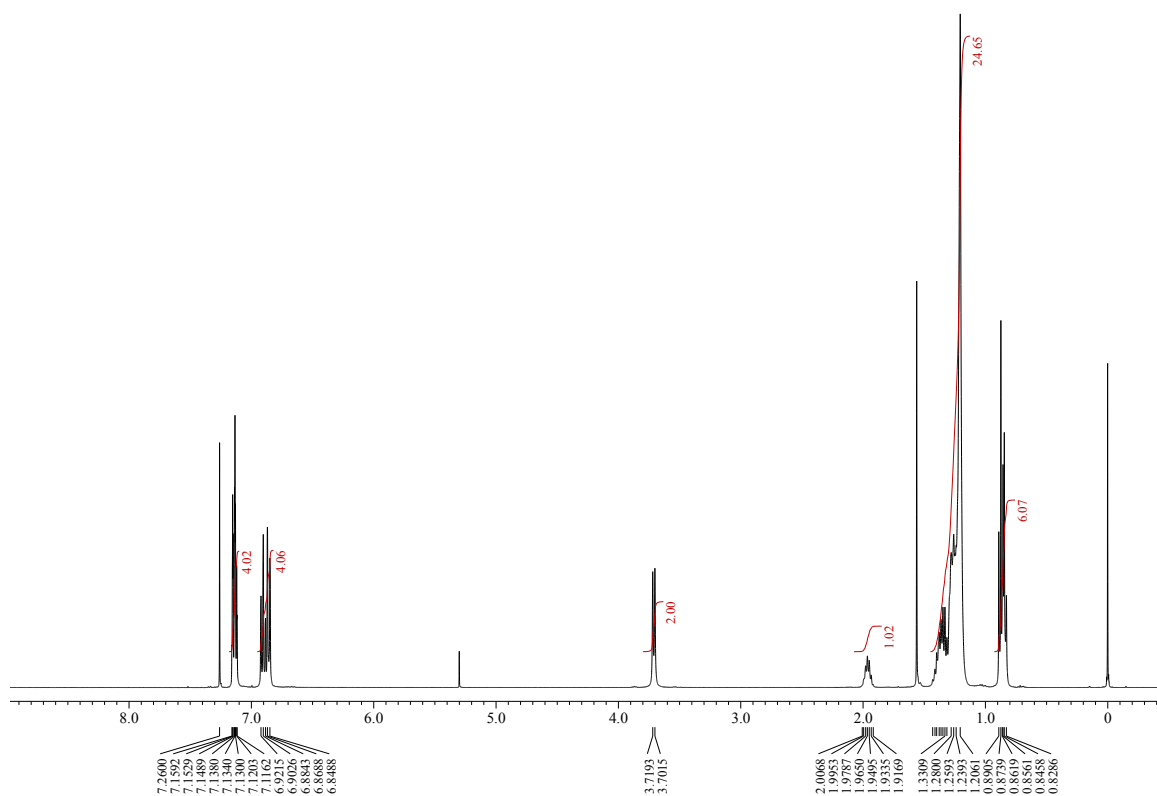

**Figure S20.**  $^1\text{H}$  spectrum of *N*-(2-hexyldecyl)phenothiazine in  $\text{CDCl}_3$  solution (400 MHz).

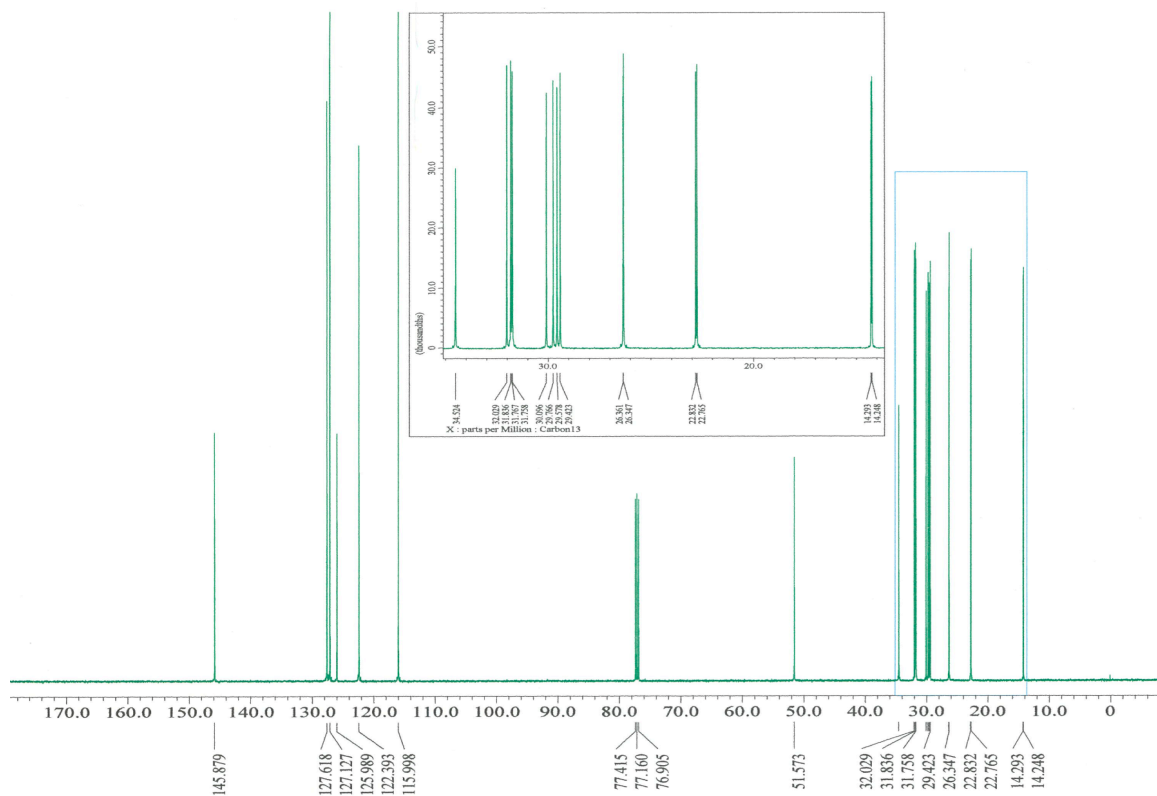

**Figure S21.**  $^{13}\text{C}\{^1\text{H}\}$  spectrum of *N*-(2-hexyldecyl)phenothiazine in  $\text{CDCl}_3$  solution (125 MHz).

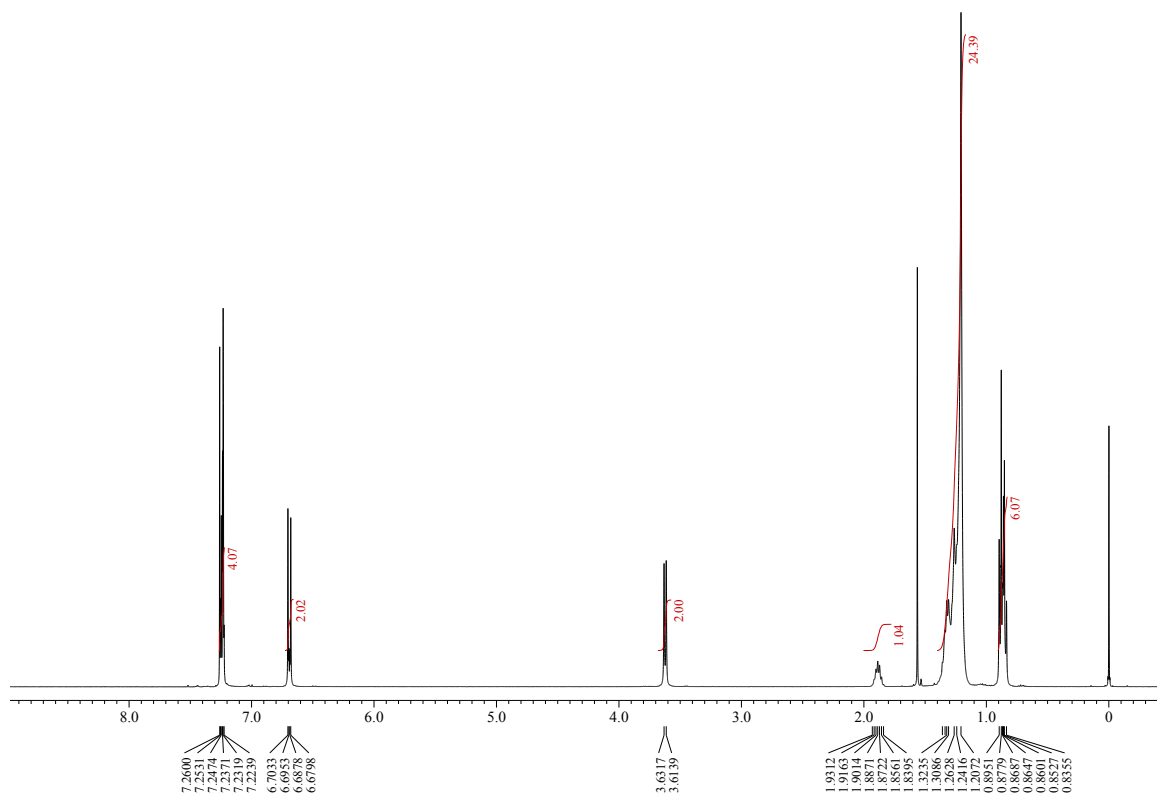

**Figure S22.**  $^1\text{H}$  spectrum of **5a** in  $\text{CDCl}_3$  solution (400 MHz).

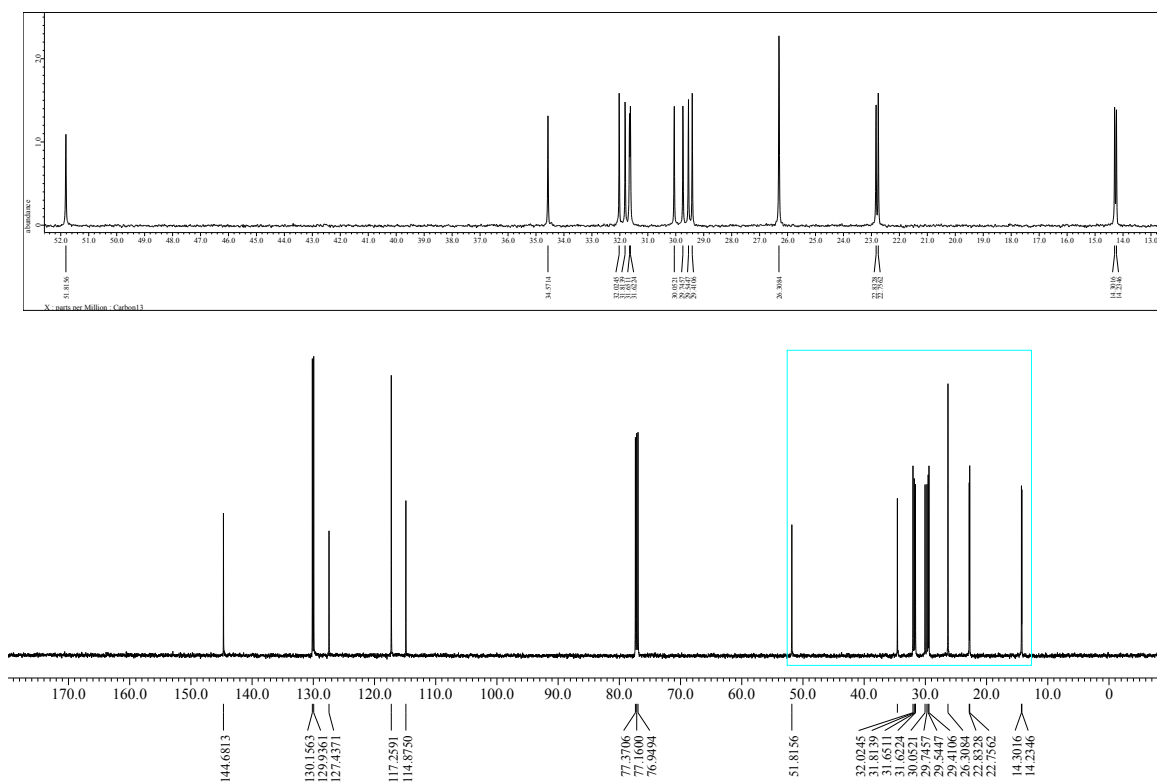

**Figure S23.**  $^{13}\text{C}\{^1\text{H}\}$  spectrum of **5a** in  $\text{CDCl}_3$  solution (150 MHz).

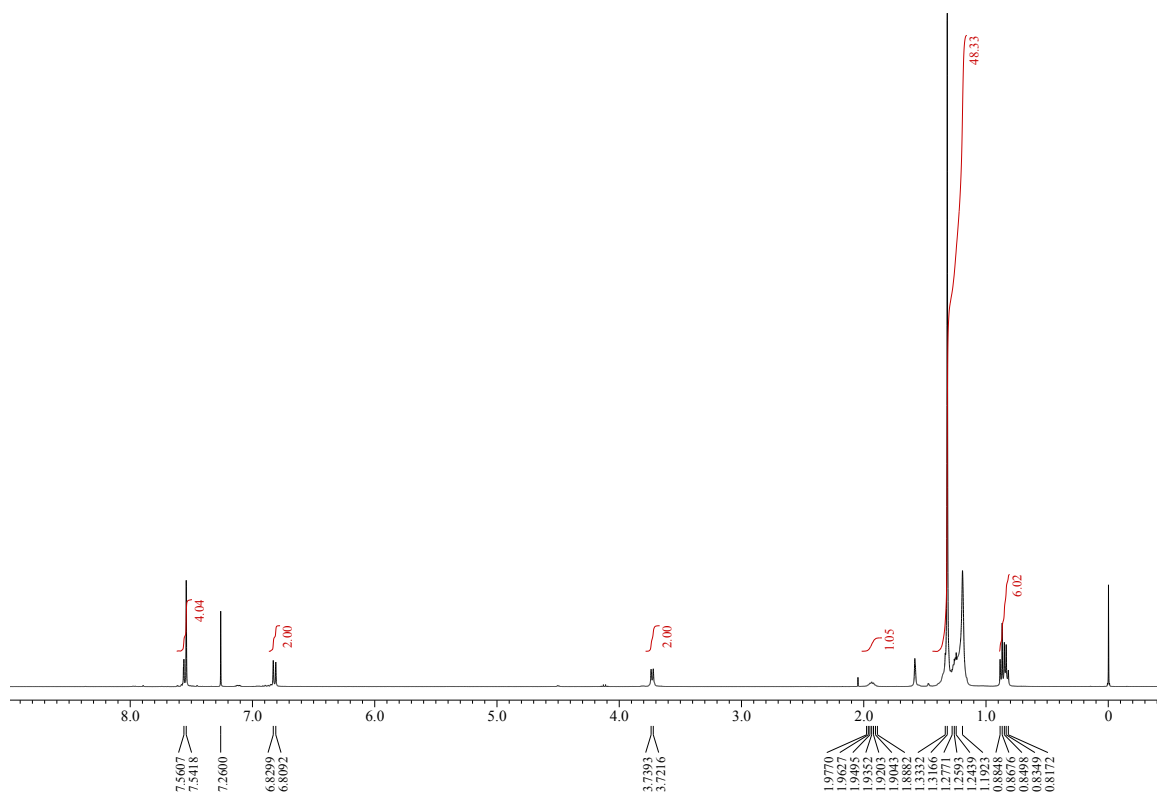

**Figure 24.**  $^1\text{H}$  spectrum of **6a** in  $\text{CDCl}_3$  solution (400 MHz).

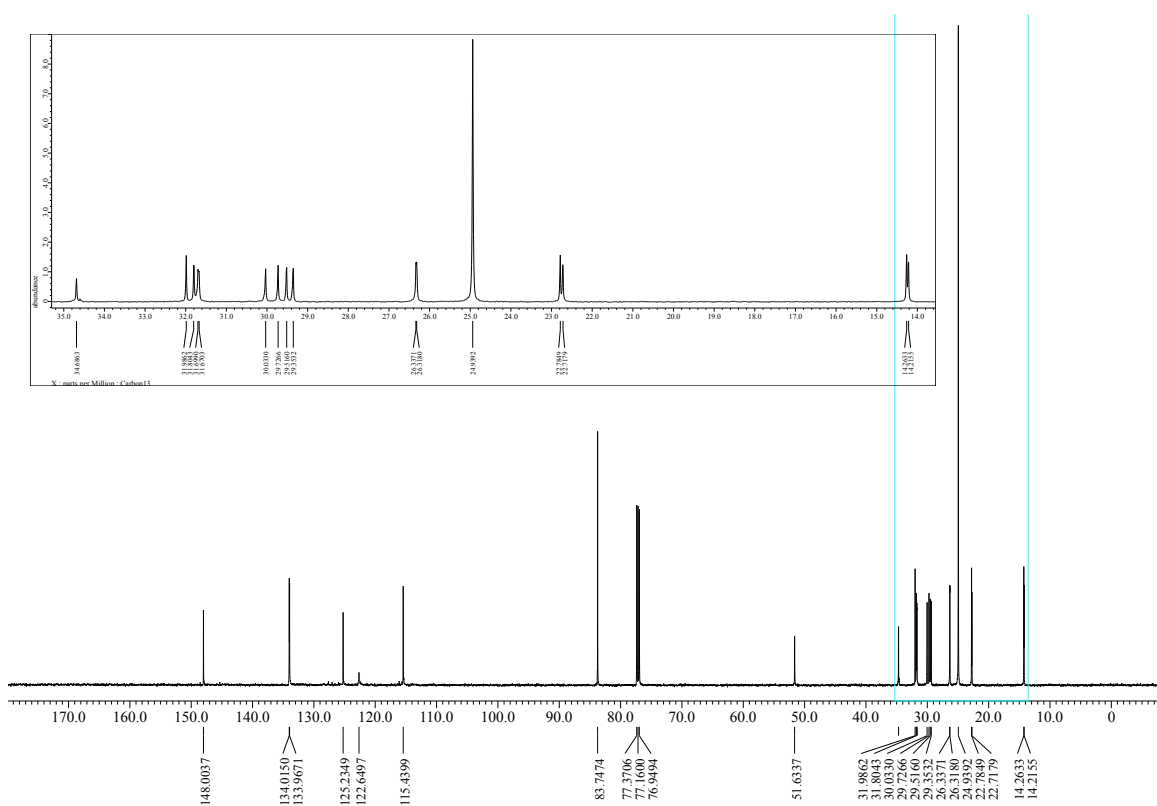

**Figure S25.**  $^{13}\text{C}\{^1\text{H}\}$  spectrum of **6a** in  $\text{CDCl}_3$  solution (150 MHz).



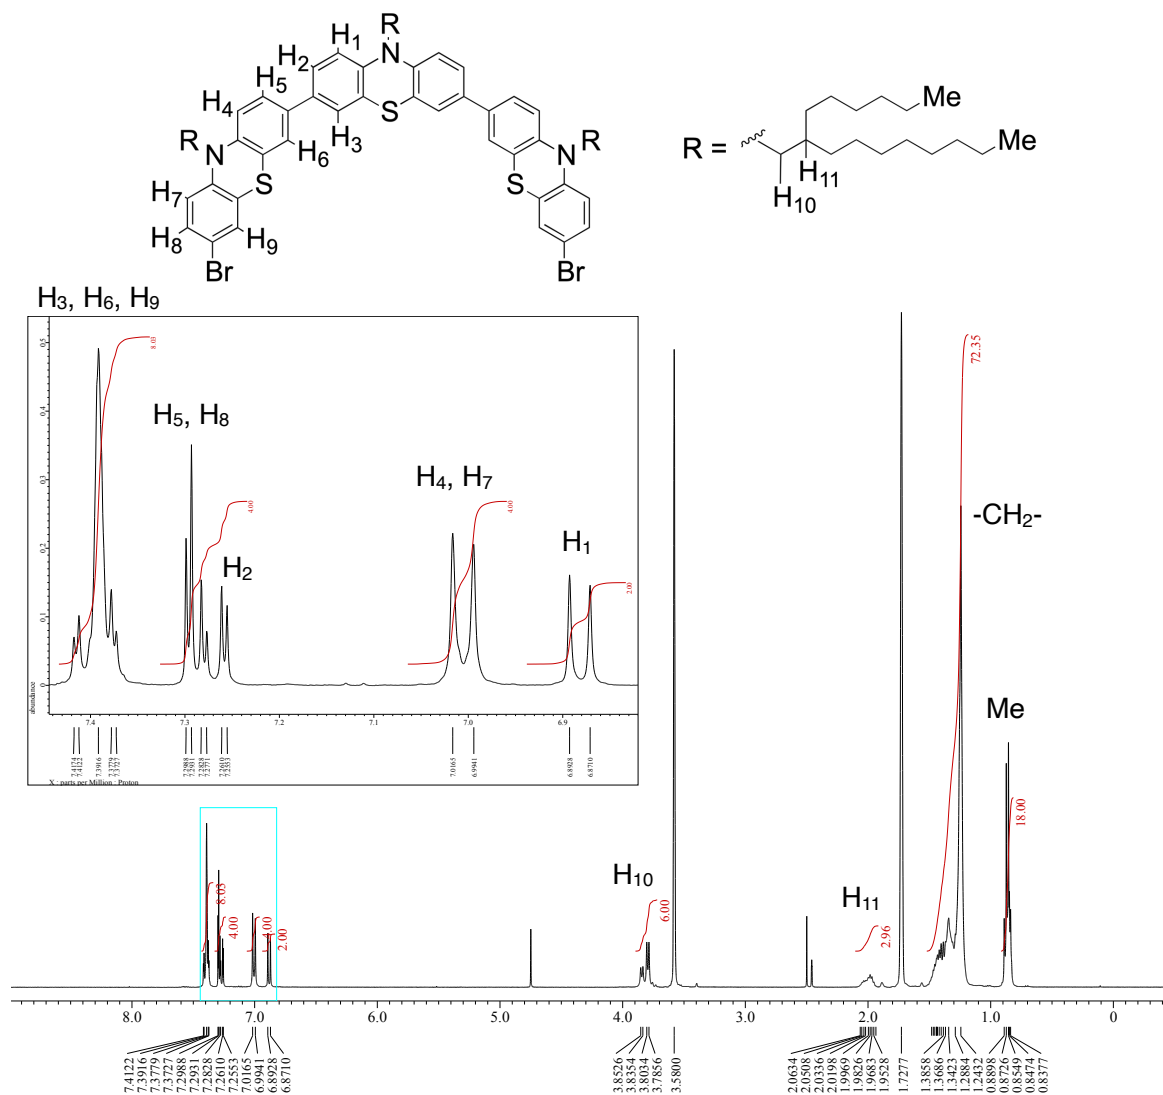

**Figure S26.** <sup>1</sup>H spectrum of **7a** in THF-*d*<sub>8</sub> solution (400 MHz). The structure of **7a** is also shown.

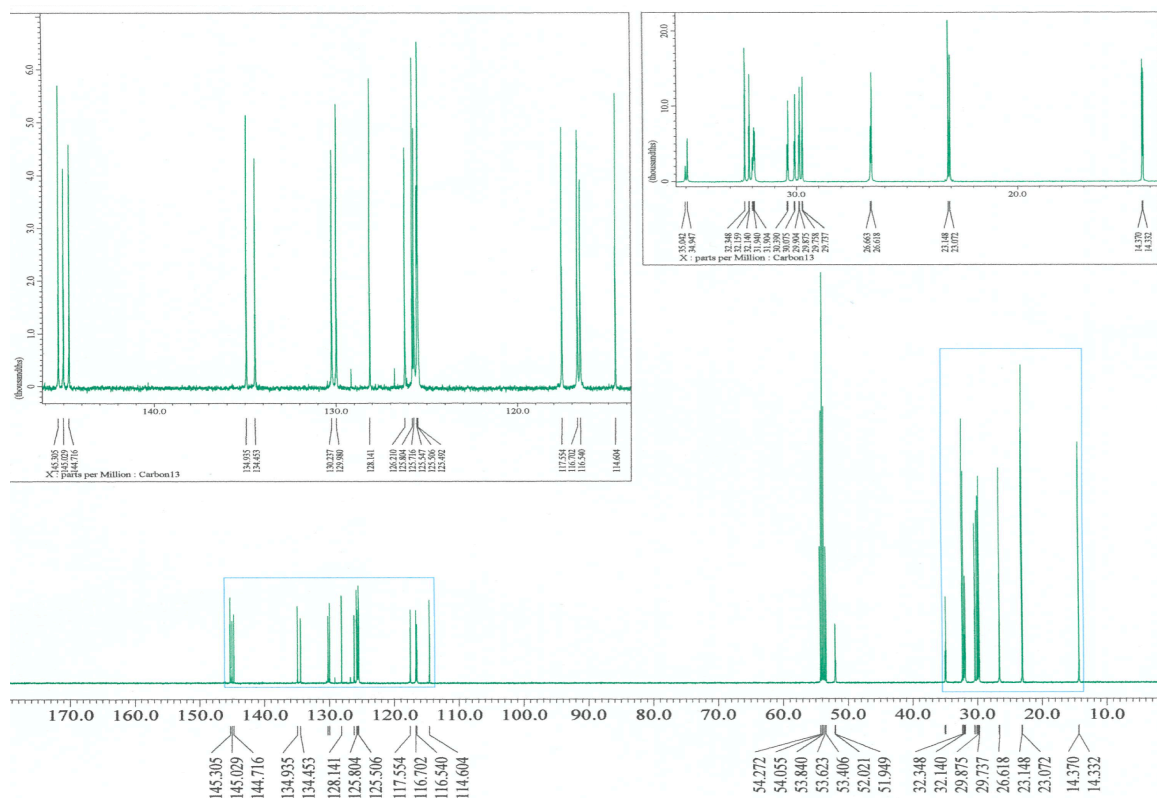

**Figure S27.**  $^{13}\text{C}\{^1\text{H}\}$  spectrum of **7a** in  $\text{CD}_2\text{Cl}_2$  solution (125 MHz).

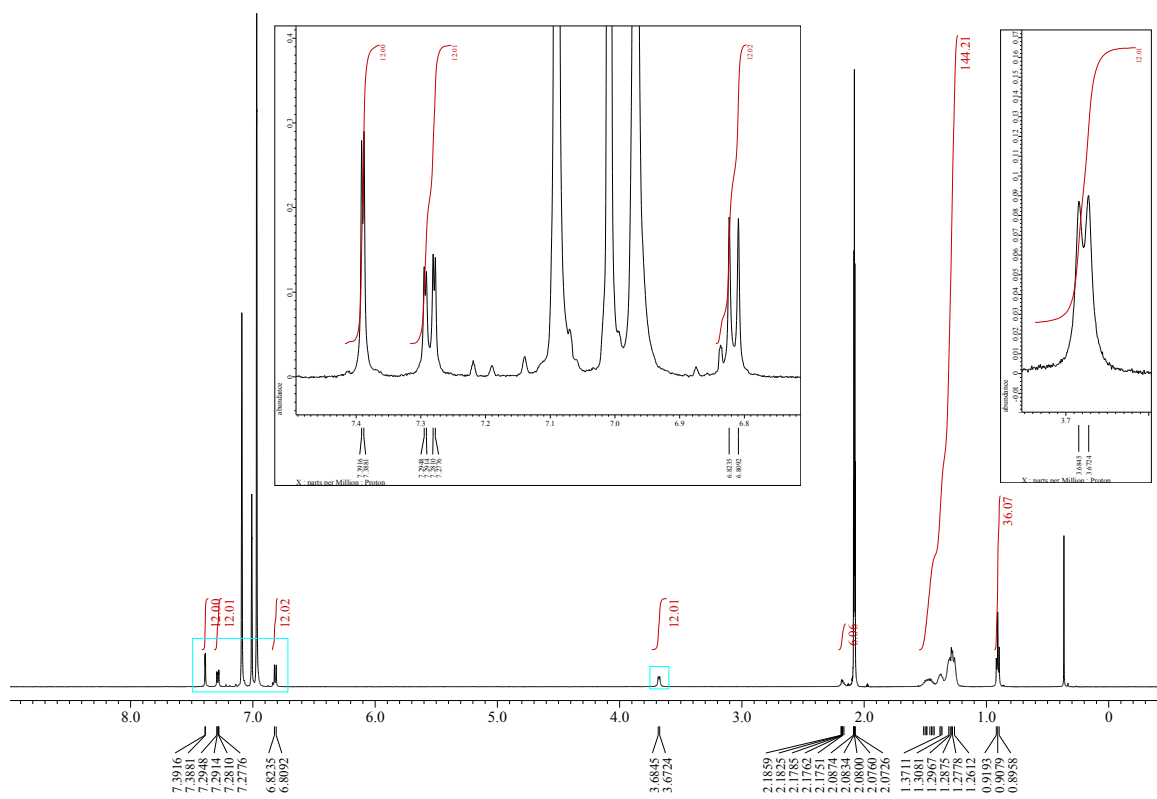

**Figure S28.**  $^1\text{H}$  spectrum of **1a** in  $\text{toluene-}d_8$  solution (600 MHz).

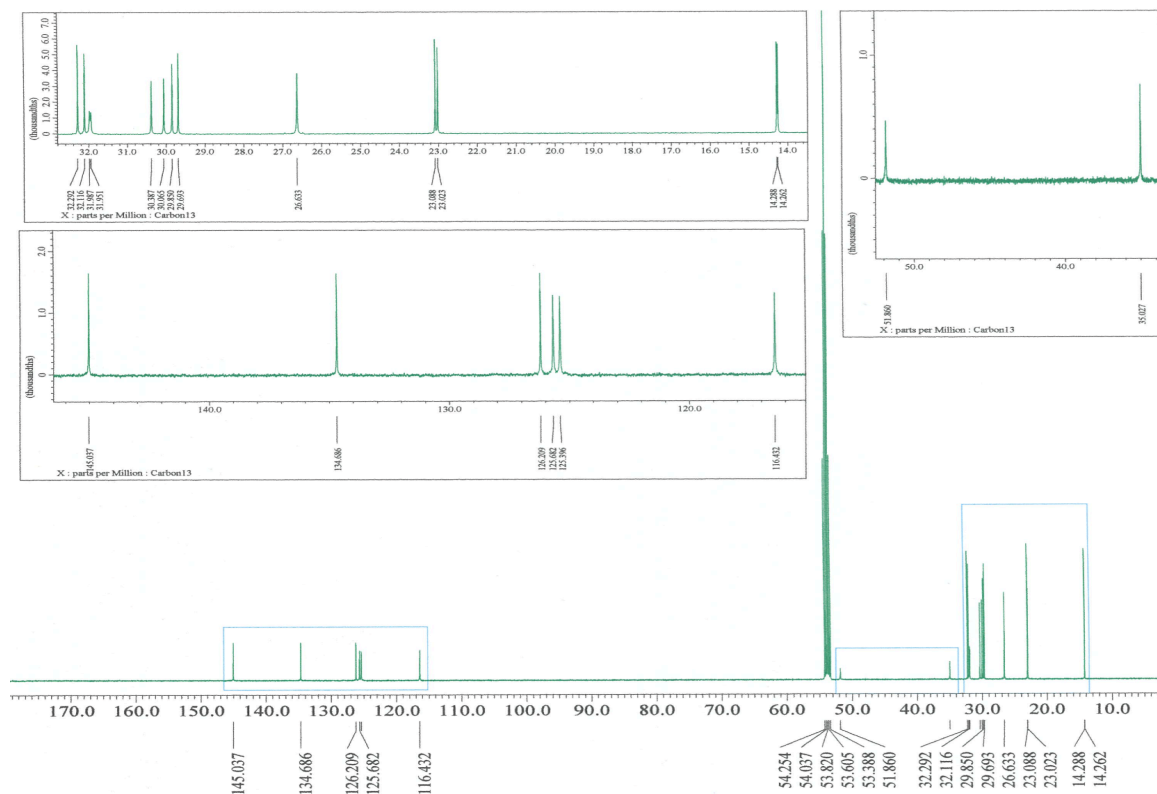

**Figure S29.**  $^{13}\text{C}\{^1\text{H}\}$  spectrum of **1a** in  $\text{CD}_2\text{Cl}_2$  solution (125 MHz).

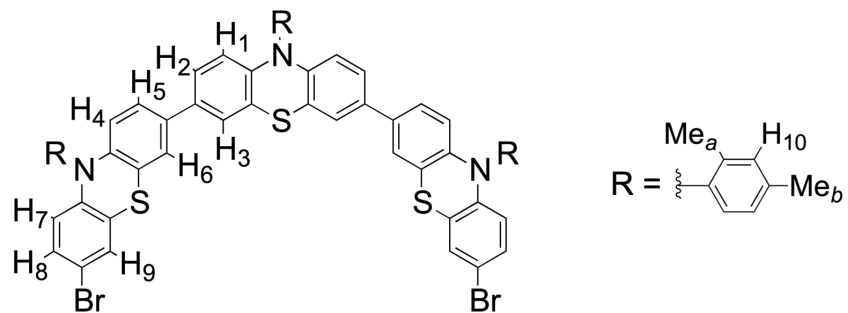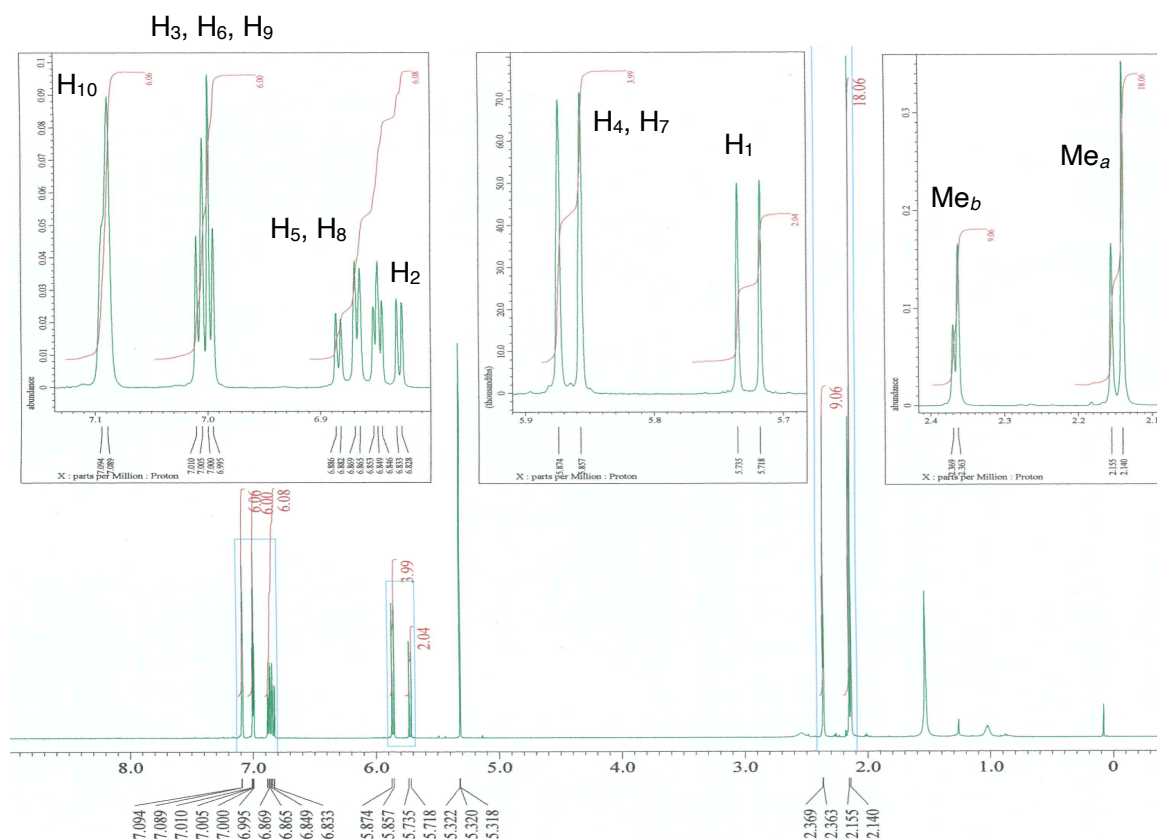

**Figure S30.** <sup>1</sup>H spectrum of **7b** in CD<sub>2</sub>Cl<sub>2</sub> solution (500 MHz). The structure of **7b** is also shown.

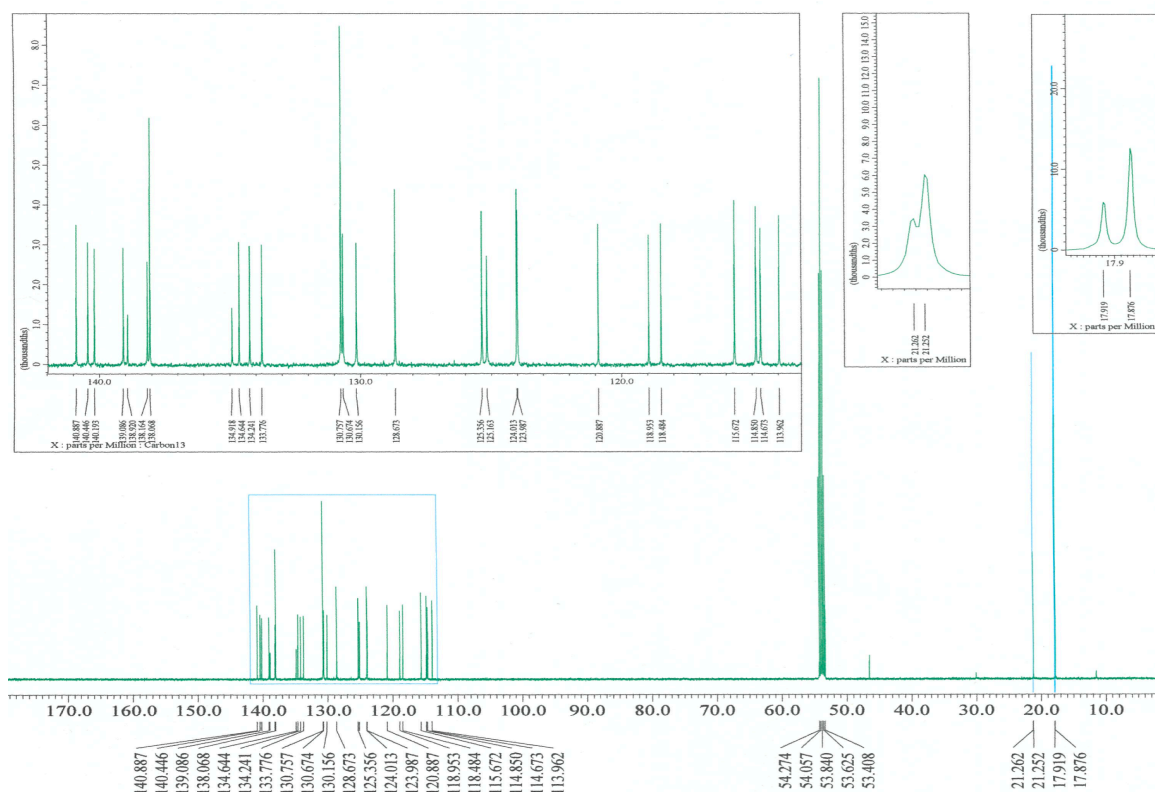

**Figure S31.**  $^{13}\text{C}\{^1\text{H}\}$  spectrum of **7b** in  $\text{CD}_2\text{Cl}_2$  solution (125 MHz).

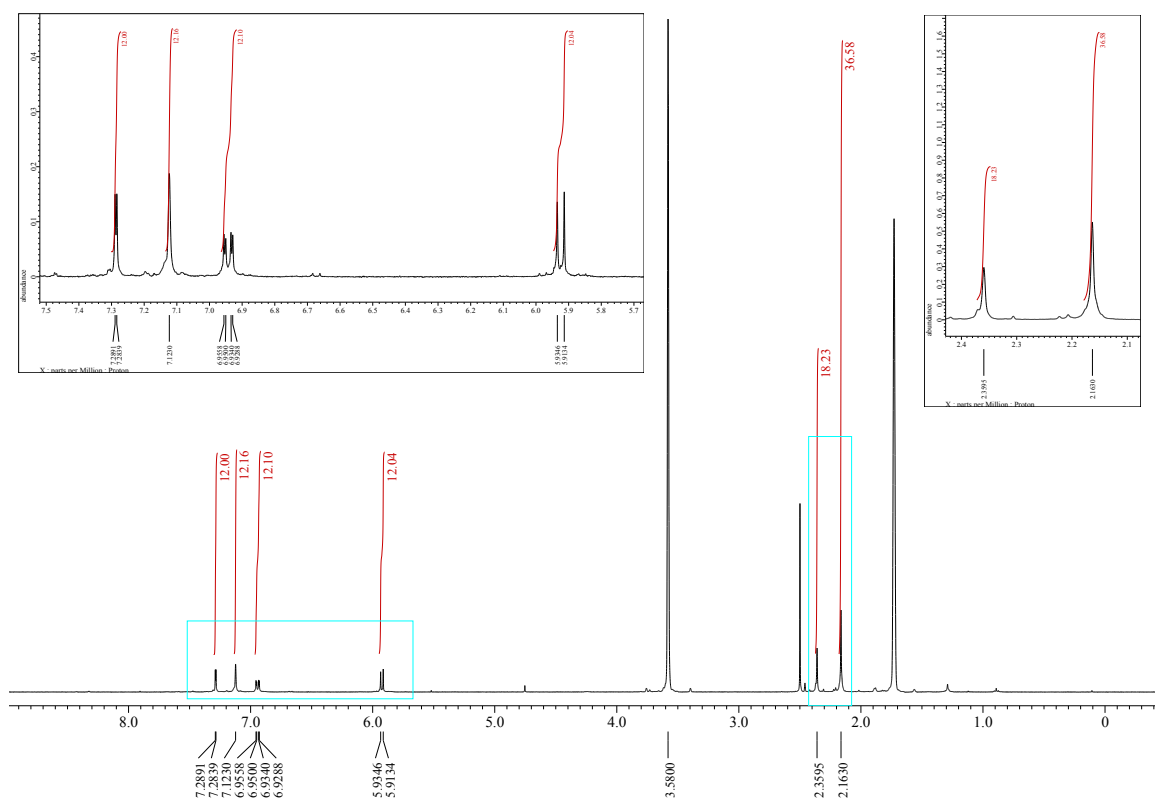

**Figure S32.**  $^1\text{H}$  spectrum of **1b** in  $\text{THF}-d_8$  solution (400 MHz).

## 9. ESI- and MALDI-TOF-MS Spectra

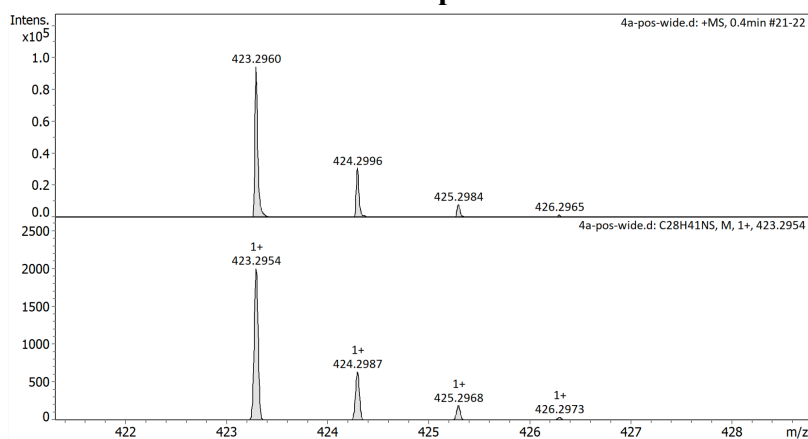

**Figure S33.** ESI-TOF-MS spectra (positive) of *N*-(2-hexyldecyl)phenothiazine (upper: found  $[M^+]$ , bottom: calculated for  $C_{28}H_{41}NS^+$ ).

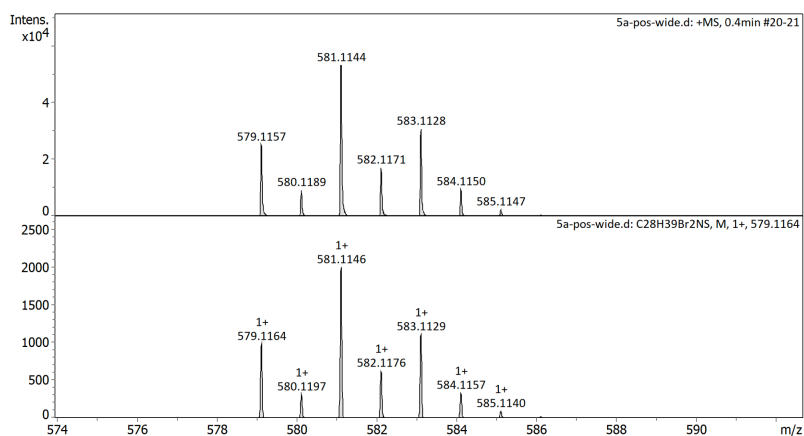

**Figure S34.** ESI-TOF-MS spectra (positive) of **5a** (upper: found  $[M^+]$ , bottom: calculated for  $C_{28}H_{39}Br_2NS^+$ ).

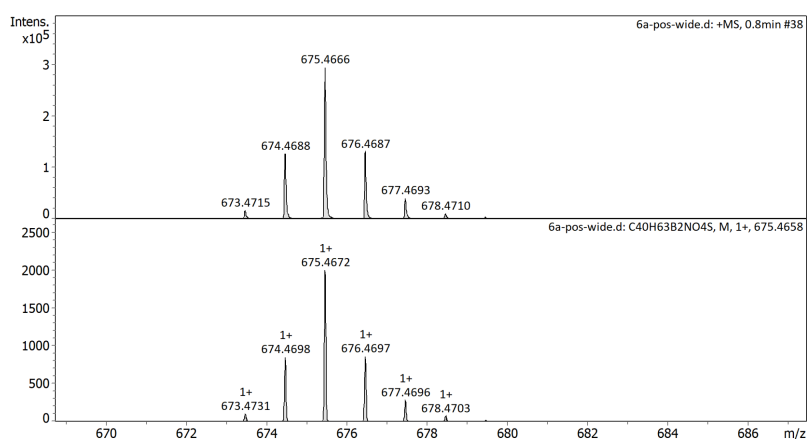

**Figure S35.** ESI-TOF-MS spectra (positive) of **6a** (upper: found  $[M^+]$ , bottom: calculated for  $C_{40}H_{63}B_2NO_4S^+$ ).

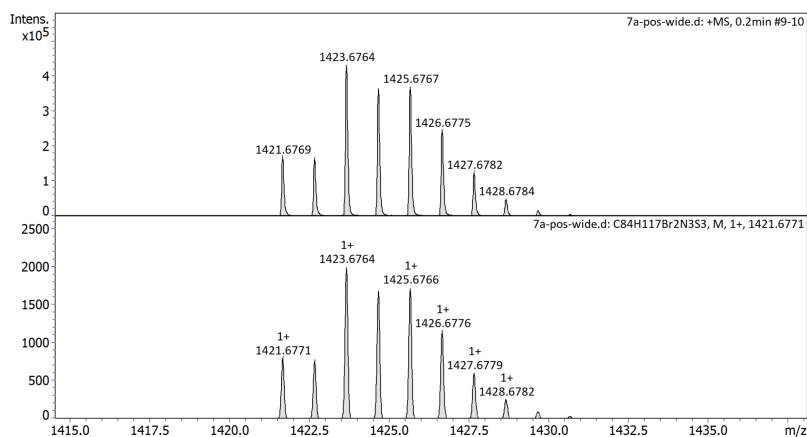

**Figure S36.** ESI-TOF-MS spectra (positive) of **7a** (upper: found  $[M^+]$ , bottom: calculated for  $C_{84}H_{117}Br_2N_3S_3^+$ ).

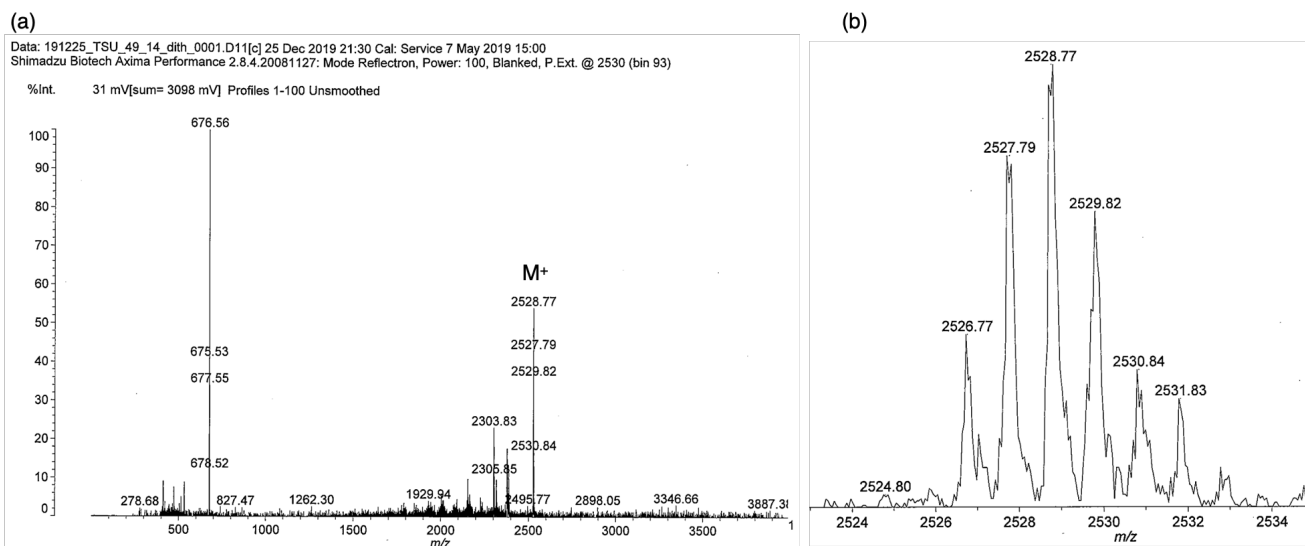

**Figure S37.** (a) MALDI-TOF-MS spectrum (positive) of **1a** (found for  $[M^+]$ ) and (b) the expansion around  $[M^+]$ .

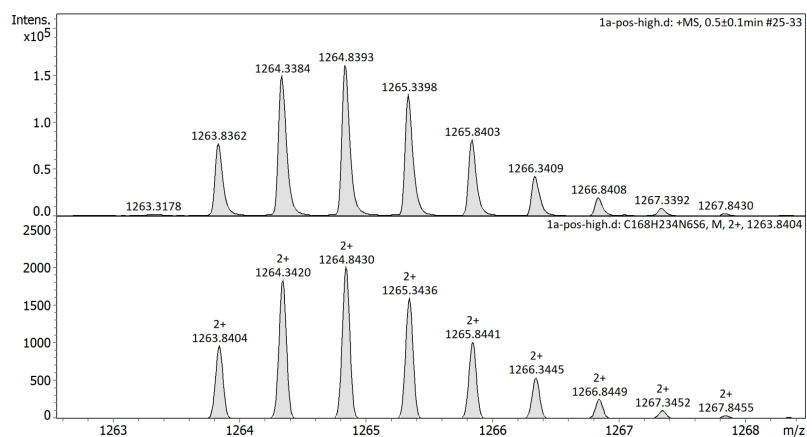

**Figure S38.** ESI-TOF-MS spectra (positive) of **1a** (upper: found  $[M^{2+}]$ , bottom: calculated for  $C_{168}H_{234}N_6S_6^{2+}$ ).

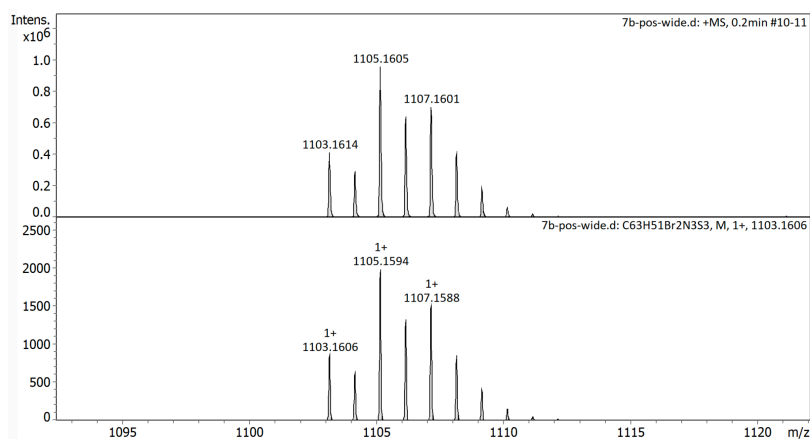

**Figure S39.** ESI-TOF-MS spectra (positive) of **7b** (upper: found  $[M^+]$ , bottom: calculated for  $C_{63}H_{51}Br_2N_3S_3^+$ ).

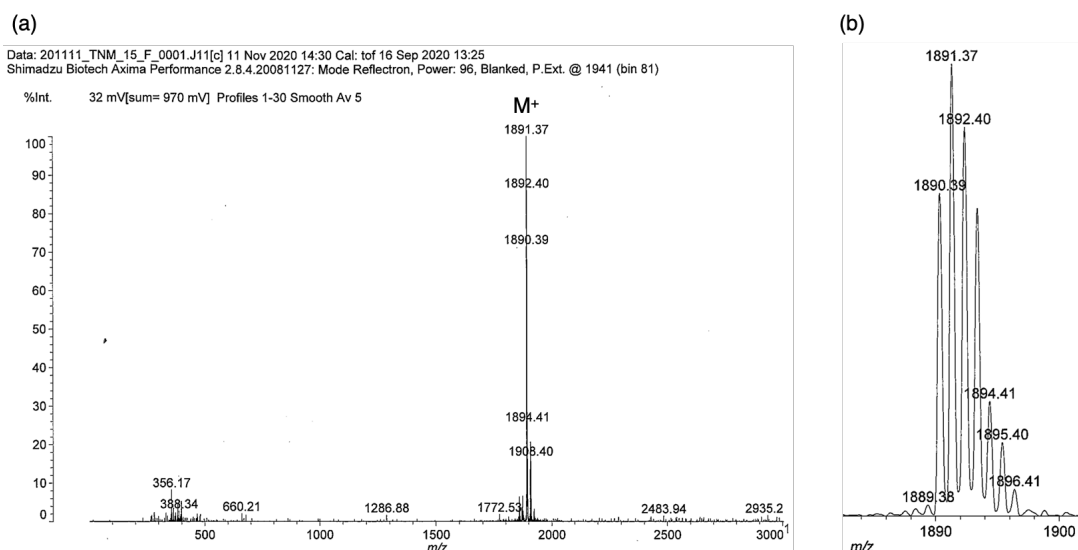

**Figure S40.** (a) MALDI-TOF-MS spectrum (positive) of **1b** (found for  $[M^+]$ ) and (b) the expansion around  $[M^+]$ .

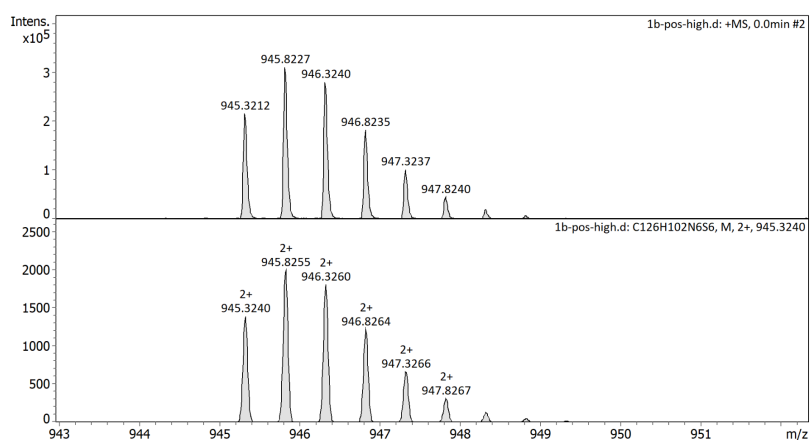

**Figure S41.** ESI-TOF-MS spectra (positive) of **1b** (upper: found  $[M^{2+}]$ , bottom: calculated for  $C_{126}H_{102}N_6S_6^{2+}$ ).



## 10. References

- [1] Y.-J. Cheng, S.-Y. Yu, S.-C. Lin, J. T. Lin, L.-Y. Chen, D.-S. Hsiu, Y. S. Wen, M. M. Lee, S.-S. Sun, *J. Mater. Chem. C* **2016**, *4*, 9499–9508.
- [2] O. V. Dolomanov, L. J. Bourhis, R. J. Gildea, J. A. K. Howard, H. Puschmann, *J. Appl. Crystallogr.* **2009**, *42*, 339–341.
- [3] G. M. Sheldrick, *Acta Crystallogr.* **2015**, *A71*, 3–8.
- [4] G. M. Sheldrick, *Acta Crystallogr.* **2015**, *C71*, 3–8.
- [5] Gaussian 16, Revision C.01, M. J. Frisch, G. W. Trucks, H. B. Schlegel, G. E. Scuseria, M. A. Robb, J. R. Cheeseman, G. Scalmani, V. Barone, G. A. Petersson, H. Nakatsuji, X. Li, M. Caricato, A. V. Marenich, J. Bloino, B. G. Janesko, R. Gomperts, B. Mennucci, H. P. Hratchian, J. V. Ortiz, A. F. Izmaylov, J. L. Sonnenberg, D. Williams-Young, F. Ding, F. Lipparini, F. Egidi, J. Goings, B. Peng, A. Petrone, T. Henderson, D. Ranasinghe, V. G. Zakrzewski, J. Gao, N. Rega, G. Zheng, W. Liang, M. Hada, M. Ehara, K. Toyota, R. Fukuda, J. Hasegawa, M. Ishida, T. Nakajima, Y. Honda, O. Kitao, H. Nakai, T. Vreven, K. Throssell, J. A. Montgomery, Jr., J. E. Peralta, F. Ogliaro, M. J. Bearpark, J. J. Heyd, E. N. Brothers, K. N. Kudin, V. N. Staroverov, T. A. Keith, R. Kobayashi, J. Normand, K. Raghavachari, A. P. Rendell, J. C. Burant, S. S. Iyengar, J. Tomasi, M. Cossi, J. M. Millam, M. Klene, C. Adamo, R. Cammi, J. W. Ochterski, R. L. Martin, K. Morokuma, O. Farkas, J. B. Foresman, and D. J. Fox, Gaussian, Inc., Wallingford CT, 2016.
- [6] R. A. Boto, F. Peccati, R. Laplaza, C. Quan, A. Carbone, J.-P. Piquemal, Y. Maday, J. Contreras-García, *J. Chem. Theory Comput.* **2020**, *16*, 4150–4158.
- [7] J. Contreras-García, E. R. Johnson, S. Keinan, R. Chaudret, J.-P. Piquemal, D. N. Beratan, W. Yang, *J. Chem. Theory Comput.* **2011**, *7*, 625–632.
- [8] E. R. Johnson, S. Keinan, P. Mori-Sánchez, J. Contreras-García, A. J. Cohen, W. Yang, *J. Am. Chem. Soc.* **2010**, *132*, 6498–6506.
- [9] Jmol: an open-source Java viewer for chemical structures in 3D. <http://www.jmol.org/>
